# 1 **Genetic determinants of endophytism in the *Arabidopsis* root** 2 **mycobiome**

3  
4 Fantin Mesny<sup>1</sup>, Shingo Miyauchi<sup>1,2</sup>, Thorsten Thiergart<sup>1</sup>, Brigitte Pickel<sup>1</sup>, Lea Atanasova<sup>3,4</sup>, Magnus  
5 Karlsson<sup>5</sup>, Bruno Hüttel<sup>6</sup>, Kerrie W. Barry<sup>7</sup>, Sajeet Haridas<sup>7</sup>, Cindy Chen<sup>7</sup>, Diane Bauer<sup>7</sup>, William  
6 Andreopoulos<sup>7</sup>, Jasmyn Pangilinan<sup>7</sup>, Kurt LaButti<sup>7</sup>, Robert Riley<sup>7</sup>, Anna Lipzen<sup>7</sup>, Alicia Clum<sup>7</sup>, Elodie  
7 Drula<sup>8,9</sup>, Bernard Henrissat<sup>10</sup>, Annegret Kohler<sup>2</sup>, Igor V. Grigoriev<sup>7,11</sup>, Francis M. Martin<sup>2,12,\*</sup>, Stéphane  
8 Hacquard<sup>1,13,\*</sup>.

9  
10 *<sup>1</sup>Max Planck Institute for Plant Breeding Research, 50829 Cologne, Germany. <sup>2</sup>Université de Lorraine,*  
11 *Institut national de recherche pour l'agriculture, l'alimentation et l'environnement, UMR Interactions*  
12 *Arbres/Microorganismes, Centre INRAE Grand Est-Nancy, 54280, Champenoux, France. <sup>3</sup>Research*  
13 *division of Biochemical Technology, Institute of Chemical, Environmental and Biological Engineering,*  
14 *Vienna University of Technology, Vienna, Austria. <sup>4</sup>Institute of Food Technology, University of Natural*  
15 *Resources and Life Sciences, Vienna, Austria. <sup>5</sup>Forest Mycology and Plant Pathology, Swedish*  
16 *University of Agricultural Sciences, SE-75007, Uppsala, Sweden. <sup>6</sup>Max Planck Genome Centre*  
17 *Cologne, Max Planck Institute for Plant Breeding Research, Cologne, Germany. <sup>7</sup>U.S. Department of*  
18 *Energy Joint Genome Institute, Lawrence Berkeley National Laboratory, Berkeley, CA, USA. <sup>8</sup>INRAE,*  
19 *USC1408 Architecture et Fonction des Macromolécules Biologiques, 13009, Marseille, France.*  
20 *<sup>9</sup>Architecture et Fonction des Macromolécules Biologiques (AFMB), CNRS, Aix-Marseille Univ.,*  
21 *13009, Marseille, France. <sup>10</sup>Department of Biological Sciences, King Abdulaziz University, Jeddah,*  
22 *Saudi Arabia. <sup>11</sup>Department of Plant and Microbial Biology, University of California Berkeley, Berkeley,*  
23 *CA, USA. <sup>12</sup>Beijing Advanced Innovation Centre for Tree Breeding by Molecular Design (BAIC-TBMD),*  
24 *Institute of Microbiology, Beijing Forestry University, Tsinghua East Road Haidian District, Beijing,*  
25 *China. <sup>13</sup>Cluster of Excellence on Plant Sciences (CEPLAS), Max Planck Institute for Plant Breeding*  
26 *Research, 50829 Cologne, Germany.*

27  
28 \*Corresponding authors: F. M. Martin ([francis.martin@inrae.fr](mailto:francis.martin@inrae.fr)) and S. Hacquard  
29 ([hacquard@mpipz.mpg.de](mailto:hacquard@mpipz.mpg.de))

30

31 **Abstract**

32 Roots of *Arabidopsis thaliana* do not engage in symbiotic associations with mycorrhizal fungi but host  
33 taxonomically diverse fungal communities that influence health and disease states. We sequenced the  
34 genomes of 41 fungal isolates representative of the *A. thaliana* root mycobiota for comparative  
35 analysis with 79 other plant-associated fungi. We report that root mycobiota members evolved from  
36 ancestors with diverse lifestyles and retained large repertoires of plant cell wall-degrading enzymes  
37 (PCWDEs) and effector-like small secreted proteins. We identified a set of 84 gene families predicting  
38 best endophytism, including families encoding PCWDEs acting on xylan (GH10) and cellulose (AA9).  
39 These genes also belong to a core transcriptional response induced by phylogenetically-distant  
40 mycobiota members in *A. thaliana* roots. Recolonization experiments with individual fungi indicated  
41 that strains with detrimental effects in mono-association with the host not only colonize roots more  
42 aggressively than those with beneficial activities but also dominate in natural root samples. We  
43 identified and validated the pectin degrading enzyme family PL1\_7 as a key component linking  
44 aggressiveness of endophytic colonization to plant health.

45

46 **Main**

47 Roots of healthy plants are colonized by a rich diversity of microbes that can modulate plant  
48 physiology and development. Root colonization by arbuscular mycorrhizal and ectomycorrhizal fungi  
49 play fundamental roles in shaping plant evolution, distribution and fitness worldwide<sup>1-6</sup>. In contrast, the  
50 physiological relevance of root-associated fungi that do not establish symbiotic structures, but retain  
51 the ability to colonize roots of asymptomatic plants in nature remains unclear. These fungal  
52 endophytes can either represent stochastic encounters or engage in stable associations with plant  
53 roots<sup>7-11</sup>. Re-colonization experiments with individual fungal isolates and germ-free plants revealed  
54 various effects of mycobiota members on host performance, ranging along the parasitism-to-  
55 mutualism continuum<sup>12-15</sup>. Importantly, the outcome of the interaction on plant health can be  
56 modulated by host genetics, host nutritional status, and local environmental conditions<sup>16-19</sup>. Here, we  
57 assessed how evolutionary and functional properties of a diverse set of cultured fungi that colonize  
58 roots of the model plant *A. thaliana* can explain evolution towards endophytism and observed  
59 outcomes on plant performance. Using comparative genomics and transcriptomics, combined with re-  
60 colonization and functional validation experiments with germ-free plants, we showed that fungal  
61 colonization capabilities and effects on plant performance are negatively linked. Furthermore, we

62 characterized a key genetic determinant of endophytism, the polysaccharide lyase family 1\_7 that  
63 links fungal colonization aggressiveness to plant health. We propose that repertoires of PCWDEs of  
64 the *A. thaliana* root mycobiota shape fungal endosphere assemblages and modulate host fitness.

65

## 66 **Results**

67 **Cultured isolates are representative of wild *A. thaliana* root microbiomes.** Fungi isolated from  
68 roots of healthy *A. thaliana* represent either stochastic encounters or robust endosphere colonizers.  
69 From a previously established fungal culture collection obtained from surface-sterilized root fragments  
70 of *A. thaliana* and relative *Brassicaceae* species<sup>15</sup>, we identified 41 isolates that could be distinguished  
71 based on their rDNA ITS1 sequences, representing 3, 27, and 37 different phyla, genera, and species  
72 of the fungal root microbiota, respectively (**Fig. 1a**). We first tested whether these phylogenetically  
73 diverse isolates were representative of naturally occurring root-colonizing fungi. Direct comparison  
74 with rDNA ITS1 sequence tags from a continental-scale survey of the *A. thaliana* root mycobiota<sup>11</sup>  
75 revealed that most of the matching sequences were abundant (mean relative abundance, RA > 0.1 %,   
76 n = 30 / 41), prevalent (sample coverage > 50 %, n = 22 / 41), and enriched (root vs. soil,  
77 log<sub>2</sub>FC, Mann-Whitney-U test, FDR < 0.05, n = 26 / 41) in *A. thaliana* root endosphere samples at a  
78 continental scale (**Fig. 1a**). Quantitatively similar results were obtained using sequence data from the  
79 independent rDNA ITS2 locus (Spearman; Sample coverage: rs = 0.65, P < 0.01; RA: rs = 0.59, P <  
80 0.01; **Fig. 1b**). The cumulative RA of the sequence tags corresponding to these 41 fungi accounted for  
81 35 % of the total RA measured in root endosphere samples across European sites, despite the under-  
82 representation of abundant Agaricomycetes and Dothideomycetes taxa (**Fig. 1c**). We next assessed  
83 the worldwide distribution and prevalence of these fungal taxa across 3,582 root samples from diverse  
84 plants retrieved from the GlobalFungi database<sup>20</sup>. Continent-wide analysis revealed that the proportion  
85 of samples with positive hits was greater in Europe (sample coverage: up to 30 %, median = 4 %) than  
86 in North America (sample coverage: up to 10 %, median = 0.5 %), and largely insignificant in samples  
87 from other continents (**Fig. 1a**). Results indicate that most of the cultured *A. thaliana* root colonizing  
88 fungi are not stochastic encounters but reproducibly colonize plant roots across geographically distant  
89 sites irrespective of differences in soil conditions and climates.

90

91 **Root mycobiota members evolved from ancestors with diverse lifestyles.** Given the broad  
92 taxonomic diversity of *A. thaliana* root mycobiota members, endosphere colonization capabilities may

93 have evolved multiple times independently across distinct fungal lineages. We sequenced the above-  
94 mentioned 41 fungal genomes using PacBio long-read sequencing and annotated them with the  
95 support of transcriptome data (**Methods**), resulting in high-quality genome drafts (number of contigs: 9  
96 - 919, median = 63; L50: 0.2 - 9.1 Mbp, median = 2.3 Mbp; **Supplementary Table 1**). Genome size  
97 varied between 33.3 and 121 Mb (median = 45 Mbp) and was significantly correlated with the number  
98 of predicted genes (number of genes: 10,414 - 25,647, median = 14,777, Spearman  $r_s = 0.92$ ,  $P =$   
99  $3.82e-17$ ) and the number of transposable elements (Spearman  $r_s = 0.86$ ,  $P = 4.13e-13$ ) (**Extended**  
100 **Data Fig. 1**). A comparative genome analysis was conducted with 79 additional representative plant-  
101 associated fungi, selected based on their previously-described lifestyles<sup>21</sup> (plant pathogens, soil/wood  
102 saprotrophs, ectomycorrhizal symbionts, ericoid mycorrhizal symbionts, orchid mycorrhizal symbionts  
103 and endophytes<sup>17,19,22-27</sup>) and close phylogenetic relationship to the strains we sequenced (**Fig. 2a**,  
104 **Extended Data Fig. 2, Supplementary Table 2**). To decipher potential evolutionary trajectories within  
105 this large fungal set, we first defined presence/absence of gene families in the 120 fungal genomes  
106 based on orthology prediction ( $N = 41,612$ ; OrthoFinder<sup>28</sup>) and subsequently predicted the ancestral  
107 genome content using the Sankoff parsimony method (GLOOME<sup>29</sup>). Next, we trained a Random  
108 Forests classification model linking presence/absence of gene families to lifestyles, resulting in a  
109 lifestyle prediction accuracy of  $R^2 = 0.56$  (**Methods**). Although this classifier cannot confidently assign  
110 a single lifestyle to one genome content, it can be used to estimate lifestyle probabilities, and can  
111 reveal potential evolutionary trajectories when applied to Sankoff-predicted ancestral genomic  
112 compositions (see pie charts, **Fig. 2a**). This probabilistic approach corroborated that recent ancestors  
113 of the beneficial root endophyte *Colletotrichum tofieldiae* were likely pathogenic<sup>17</sup>, whereas those of  
114 beneficial Sebaciniales - like those of ectomycorrhizal Agaricomycetes - were predicted to be  
115 saprotrophs<sup>13,30</sup>. According to the classifier's predictions, Agaricomycetes and Mortierellomycetes in  
116 *A. thaliana* mycobiota likely derive from soil saprotrophs, while the root-associated lifestyle seems  
117 ancestral in the classes Dothideomycetes, Leotiomycetes and Sordariomycetes, which emerged more  
118 recently<sup>31</sup> (**Fig. 2a**). Therefore, *in planta* accommodation of *A. thaliana* root mycobiota members  
119 occurred multiple times, independently during evolution, as these fungi evolved from ancestors with  
120 diverse lifestyles.

121  
122 **Functional overlap in genomes of root mycobiota members and endophytes.** Isolation of  
123 mycobiota members from roots of healthy plants prompted us to test whether their gene repertoires



124 more extensively resemble those of mycorrhizal symbionts, known endophytes, saprotrophs or  
125 pathogens. While the genomes of ectomycorrhizal fungi were shown to be enriched in transposable  
126 elements<sup>32,33</sup>, the percentage of these elements remained low in genomes of root mycobiota members  
127 (0.69 % - 28.43 %, median = 5.44 %, **Extended Data Fig. 3**). We predicted genes known to play a  
128 role in fungal-host interactions (**Methods**), including those encoding carbohydrate-active enzymes  
129 (CAZymes), proteases, lipases and effector-like small secreted proteins (SSPs<sup>34</sup>), and then assessed  
130 differences in repertoire diversity across lifestyles (**Fig. 2b**). Unlike ectomycorrhizal fungi<sup>32,33</sup>, but  
131 similarly to beneficial endophytes<sup>16,17,19,23,27</sup>, the genomes of root mycobiota members retained large  
132 repertoires of genes encoding plant cell wall-degrading enzymes (PCWDEs), SSPs and proteases  
133 (ANOVA-TukeyHSD,  $P < 0.05$ , **Fig. 2b**). Using Permutational multivariate analysis of variance  
134 (PERMANOVA based on Jaccard dissimilarity indices between genomes), we distinguished lifestyle  
135 from phylogenetic signals in gene repertoire composition (**Fig. 2c, Extended Data Fig. 4a**). This  
136 revealed that “lifestyle” significantly explained variation in gene repertoire composition (phylogeny:  $R^2$ :  
137 0.11 - 0.37,  $P < 0.05$ ; lifestyle:  $R^2$ : 0.07 - 0.16,  $P < 0.05$ , **Extended Data Fig. 4a**). Interestingly, the  
138 factor “lifestyle” explained the highest percentage of variance for PCWDE repertoires (phylogeny:  $R^2$  =  
139 0.18; lifestyle:  $R^2$  = 0.16, **Extended Data Fig. 4a**), suggesting that these CAZymes likely play an  
140 important role in lifestyle differentiation. Further pairwise comparisons between lifestyle groups  
141 revealed that gene repertoire composition of root mycobiota members could not be differentiated from  
142 those of beneficial endophytes (*post-hoc* pairwise PERMANOVA,  $P > 0.05$ , **Fig. 2c**). Therefore, gene  
143 arsenals of *A. thaliana* root-colonizing fungi resemble those of endophytes more than saprotrophs,  
144 pathogens or mycorrhizal symbionts. Across the tested gene groups, the families which contribute the  
145 most in segregating genomes by lifestyles (**Extended Data Fig. 4b, Methods**) include two xylan  
146 esterases (CE1, CE5), two pectate lyases (PL3\_2, PL1\_4), one pectin methyltransferase (CE8) and  
147 one serine protease (S08A). Further analysis focusing on total predicted secretomes (**Extended Data**  
148 **Fig. 5, Extended Data Fig. 6a**) and CAZymes subfamilies (**Extended Data Fig. 6b**) confirmed strong  
149 genomic similarities between *A. thaliana* root mycobiota members and known endophytic fungi.

150

151 **Genomic traits of the endophytic lifestyle.** To identify unique genetic determinants characterizing  
152 both known endophytes and *A. thaliana* root mycobiota members, the 120 genomes were mined for  
153 gene families whose copy numbers allow efficient segregation of these fungi ( $n = 50$ ) from those with  
154 other lifestyles ( $n = 70$ ). We trained a Support Vector Machines classifier with Recursive Feature

155 Elimination (SVM-RFE) on the gene counts of orthogroups significantly enriched or depleted between  
156 these two groups (ANOVA, FDR < 0.05). A minimal set of 84 gene families that best segregated the  
157 two lifestyle groups was retained in the final SVM-RFE classifier ( $R^2 = 0.80$ , **Fig. 3a** and  
158 **Supplementary Table 3**). These orthogroups can explain lifestyle differentiation independently from  
159 phylogenetic signal (PhyloGLM<sup>35</sup> – 83 / 84, FDR < 0.05) and were significantly enriched in enzymes  
160 (i.e., GO *catalytic activity*, GOATOOLS<sup>36</sup> FDR = 0.002, **Supplementary Table 3**) and in CAZymes  
161 (Fisher Exact Test,  $P = 0.03$ , data not shown). Notably, genes encoding PCWDEs acting on pectin  
162 (CE12, GH145, PL11), cellulose (AA9) and hemicellulose (i.e., xylan: GH10, GH16, CE1) were  
163 identified, together with others encoding peptidases, transporters and proteins involved in amino acid  
164 metabolism (**Fig. 3b** and **Supplementary Table 3**). These 84 gene families were analysed for co-  
165 expression in published fungal transcriptomic datasets (STRING<sup>37</sup>). An MCL-clustered co-expression  
166 network built on families enriched in known endophytes and *A. thaliana* mycobiota members revealed  
167 six clusters of co-expressed genes (**Fig. 3c**), including carbohydrate membrane transporters, and  
168 genes involved in carbohydrate metabolism (e.g., GH10) and amino acid metabolism. These functions  
169 are likely to be essential for root colonization and endophytism.

170  
171 **Root colonization capabilities explain fungal outcome on plant growth.** Root-colonizing fungi can  
172 span the endophytism-parasitism continuum but little is known regarding the genetic determinants that  
173 govern this delicate shift. We tested the extent to which the 41 fungi can modulate host physiology by  
174 performing binary interaction experiments with germ-free *A. thaliana* plants grown in two nutrient  
175 conditions under laboratory conditions (inorganic orthophosphate, Pi: 100  $\mu$ M and 625  $\mu$ M  $\text{KH}_2\text{PO}_4$ ,  
176 **Fig. 4a**). We determined germination rate (GR) and shoot fresh weight (SFW) of five-week-old plants  
177 ( $n = 7,127$ ) and used these parameters to calculate a plant performance index ( $\text{PPI} = \text{SFW} * \text{GR}$ ,  
178 **Methods**). Under Pi-sufficient conditions, 39 % of the isolates (16 / 41) negatively affected host  
179 performance compared to germ-free control plants, whereas 61 % (25 / 41) had no significant effect  
180 on PPI (Kruskal-Wallis - Dunn Test, *adj. P* < 0.05, **Fig. 4a**). Fungal-induced change in PPI was  
181 significantly modulated by the nutritional status of the host, as depletion of bioavailable Pi in the  
182 medium was associated with a reduction in the number of fungi with pathogenic activities (20 %, 8 /  
183 41) and an increase of those with beneficial activities (12 %, 5 / 41) (Kruskal-Wallis - Dunn Test, *adj. P*  
184 < 0.05, **Fig. 4a**). Notably, PPI measured for low and high Pi conditions was negatively correlated with  
185 strain RA in roots of European *A. thaliana* populations (Spearman, High Pi:  $r_s = -0.33$ ,  $P = 0.033$ ; Low

186 Pi:  $r_s = -0.49$ ,  $P = 0.0014$ , **Fig. 4b**), suggesting a potential link between the ability of a fungus to  
187 efficiently colonize roots and the observed negative effect on plant performance. Consistent with this  
188 hypothesis, fungal load measured by quantitative PCR in roots of five-week-old *A. thaliana* colonized  
189 by individual fungal isolates (**Extended Data Fig. 7a, b**), was positively correlated with fungal RA in  
190 roots of natural populations (Spearman, High Pi:  $r_s = 0.57$   $P = 0.0002$ ; Low Pi:  $r_s = 0.52$ ,  $P = 0.0008$ ,  
191 **Fig. 4c**), and was also negatively linked with PPI outcome (Spearman, High Pi:  $r_s = -0.44$ ,  $P = 0.005$ ,  
192 Low Pi:  $r_s = -0.30$ ,  $P = 0.057$ ) (**Extended Data Fig. 7c, d**). Taken together, our results suggest that  
193 both nutritional constraints and controlled colonization abilities drive beneficial fungal-host  
194 associations.

195

196 **A conserved set of CAZyme-encoding genes is induced *in planta* by diverse root mycobiota**

197 **members.** We tested whether putative genomic determinants of endophytism defined above by a  
198 machine learning approach were part of a core response activated *in planta* by root mycobiota  
199 members. Six representative fungi from three different phylogenetic classes were selected for *in*  
200 *planta* transcriptomics on low Pi sugar-free medium: *Chaetomium* sp. 0009 (*Cs*), *Macrophomina*  
201 *phaseolina* 0080 (*Mp*), *Paraphoma chrysantemicola* 0034 (*Pc*), *Phaeosphaeria* sp. 0046c (*Ps*),  
202 *Truncatella angustata* 0073 (*Ta*), *Halenospora varia* 0135 (*Hv*). Confocal microscopy of roots grown in  
203 mono-association with these fungi highlighted similar colonization of root surfaces and local  
204 penetrations of hyphae in epidermal cells (**Extended Data Fig. 8**). After mapping of RNA-seq reads  
205 on genome assemblies (Hisat2<sup>38</sup>) and differential expression analysis (*in planta* vs. on medium,  
206 DESeq2<sup>39</sup>), significant log<sub>2</sub> fold-change (log<sub>2</sub>FC) values were summed by orthogroups, allowing  
207 between-strain transcriptome comparisons (**Methods**). Transcriptome similarity did not fully reflect  
208 phylogenetic relationships since *Cs* and *Ta* (Sordariomycetes) clustered with *Hv* (Leotiomycete),  
209 whereas *Mp*, *Pc* and *Ps* (Dothideomycetes) showed substantial transcriptome differentiation (**Fig. 5a**).  
210 Although *in planta* transcriptional reprogramming was largely strain-specific, we identified a core set of  
211 26 gene families that were consistently over-expressed by these unrelated fungi in *A. thaliana* roots  
212 (**Fig. 5b**). We observed a remarkable over-representation of genes coding for CAZymes acting on  
213 different plant cell wall components (i.e., 19 / 26, 73 %), including cellulose, xylan and pectin (**Fig. 5c**).  
214 This set was also significantly enriched in families previously identified as putative determinants of  
215 endophytism by our SVM-RFE classifier (Fisher exact test,  $P < 0.05$ ), including AA9 and GH10  
216 CAZyme families. Inspection of fungal genes over-expressed *in planta* by each strain

217 **(Supplementary Table 4)**, followed by independent GO enrichment analyses, corroborated that  
218 carbohydrate metabolic processes and xylanase activities were the most common fungal responses  
219 activated *in planta* (GOATOOLS, FDR < 0.05, **Fig. 5d**). Notably, we also observed important  
220 percentages of genes encoding effector-like SSPs induced *in planta* (9.8 % - 42.4 %, median = 21.6  
221 %). Together, these enzymes and SSPs are likely to constitute an essential toolbox for *A. thaliana* root  
222 colonization and for fungal acquisition of carbon compounds from plant material. Analysis of  
223 corresponding *A. thaliana* root transcriptomes revealed that different responses were activated by the  
224 host as a result of its interaction with these six unrelated mycobiota members (**Extended Data Fig. 9**,  
225 **Supplementary Table 5**). Our data suggest that phylogenetically-distant mycobiota members  
226 colonize *A. thaliana* roots using a conserved set of PCWDEs and have markedly different impacts on  
227 their host.

228

229 **Polysaccharide lyase family PL1\_7 as a key component linking colonization aggressiveness to**  
230 **plant health.** We reported above a potential link between aggressiveness in root colonization and  
231 detrimental effect of fungi on PPI. To identify underlying genomic signatures explaining this link, we  
232 employed three different methods. First, inspection of diverse gene categories across genomes of  
233 beneficial, neutral, and detrimental fungi revealed significant enrichments in CAZymes (especially  
234 polysaccharide/pectate lyases, PLs) and proteases in the genomes of detrimental fungi (Low Pi  
235 conditions, Kruskal-Wallis and Dunn tests, **Extended Data Fig. 10a, b**). In these categories, three  
236 pectate lyases (PL1\_4, PL1\_7, PL3\_2) and three peptidases (S08A, A01A, S10) contributed the most  
237 in segregating genomes by effect on plants (see the count in gene copy in **Extended Data Fig. 10c**).  
238 Second, multiple testing of association between secreted CAZyme counts ( $n = 199$  families in total)  
239 and fungal effect on PPI identified the PL1\_7 family as the only family significantly linked to  
240 detrimental effects (ANOVA, Bonferroni; Low Pi:  $P = 0.026$ ; High Pi: not significant; **Fig. 6a**). Finally,  
241 an SVM-RFE classifier was trained on the gene counts of all orthogroups that were significantly  
242 enriched or depleted in genomes of detrimental *versus* non-detrimental fungi (ANOVA, FDR < 0.05).  
243 While this method failed at building a classifier to predict detrimental effects at high Pi (no families  
244 significantly enriched/depleted), it successfully predicted detrimental effects at low Pi with very high  
245 accuracy ( $R^2 = 0.88$ ). A minimal set of 11 orthogroups discriminating detrimental from non-detrimental  
246 fungi was identified (**Fig. 6b, Supplementary Table 6**), and includes gene families encoding  
247 membrane transporters, zinc-finger domain containing proteins, a salicylate monooxygenase and a

248 PL1 orthogroup containing the aforementioned PL1\_7 CAZyme subfamily and related PL1\_9 and  
249 PL1\_10 subfamilies. Further phylogenetic instability analysis based on duplication and mutation rates  
250 (MIPhy<sup>40</sup>) identified PL1\_9 and PL1\_10 as slow-evolving clades in the gene family tree (instability =  
251 30.94 and 18.86 respectively, **Fig. 6c**), contrasting with most PL1\_7 genes that were located in two  
252 rapidly-evolving clades (index = 85.30 and 66.12). Notably, genomic counts of PL1\_7, but not  
253 PL1\_9/10, remained significantly associated to detrimental host phenotypes after correction for the  
254 phylogenetic signal in our dataset (PhyloGLM<sup>35</sup>, FDR = 0.03). PL1\_7 was also part of the core  
255 transcriptional response activated *in planta* by six non-detrimental fungi (**Fig. 5c**) and was enriched in  
256 mycobiota members and endophytes in comparison to saprotrophs and mycorrhizal fungi (**Extended**  
257 **Data Fig. 10d**). Therefore, degradation of pectin by root mycobiota members is likely crucial for  
258 penetration of — and accommodation in — pectin-rich *A. thaliana* cell walls. However, the remarkable  
259 expansion of this gene family in detrimental compared to non-detrimental fungi predicts a possible  
260 negative link between colonization aggressiveness and plant performance. To test this hypothesis, we  
261 took advantage of the *Trichoderma reesei* QM9414 strain (WT, PL1\_7 free background) and its  
262 corresponding heterologous mutant lines over-expressing *pel12*, a gene from *Clonostachys rosea*  
263 encoding a PL1\_7 pectate lyase with direct enzymatic involvement in utilization of pectin<sup>41</sup>. By  
264 performing plant recolonization experiments at low Pi with these lines, we observed that *T. reesei*  
265 *pel12*OE lines negatively affected PPI with respect to their parental strain (ANOVA and TukeyHSD  
266 test,  $P < 0.05$  for two out of three independent overexpressing lines, **Fig. 6d**), and this phenotype was  
267 associated with a significant increase in fungal load in plant roots (Kruskal-Wallis and Dunn test,  $P <$   
268  $0.05$ , **Fig. 6e**). Taken together, our data indicate that pectin-degrading enzymes belonging to the  
269 PL1\_7 family are key fungal determinants linking colonization aggressiveness to plant health.

270

## 271 **Discussion**

272 We report here that genomes of fungi isolated from roots of healthy *A. thaliana* harbour a remarkable  
273 diversity of genes encoding secreted proteins and CAZymes that have often been described for soil  
274 saprotrophs. However, given that these fungi were 1) isolated from surface-sterilized root fragments<sup>15</sup>,  
275 2) enriched in plant roots *versus* surrounding soil samples at a continental scale<sup>11</sup> (**Fig.1**), and 3) able  
276 to recolonize roots of germ-free plants (**Extended Data Figs 7 and 8**), it was not surprising that both  
277 the diversity and the composition of their gene repertoires resemble those of previously described  
278 endophytes<sup>17,19,22</sup> (**Fig. 2**). Unlike the remarkable loss in PCWDE-encoding genes in the genomes of

279 most ectomycorrhizal fungi<sup>32,33</sup>, evolution towards endophytism in root mycobiota members is  
280 therefore not associated with genome reduction in saprotrophic traits, as previously suggested<sup>16</sup>.  
281 Using a machine learning approach, together with *in planta* transcriptomic experiments, we identified  
282 genes encoding CAZyme families AA9 (copper-dependent lytic polysaccharide monooxygenases,  
283 acting on cellulose chains) and GH10 (xylanase) as potential determinants of endophytism (**Figs 3**  
284 **and 5**). Interestingly, these same families were strongly expanded in genomes of beneficial root  
285 mutualists belonging to *Serendipitaceae*<sup>16,42</sup> compared to mycorrhizal mutualists<sup>32</sup> and might therefore  
286 represent key genetic components explaining adaptation to – and accommodation in – *A. thaliana*  
287 roots.

288 Although the 41 *A. thaliana* root mycobiota members were isolated from roots of healthy-looking  
289 plants, experiments in mono-associations with the host revealed a diversity of effects on plant  
290 performance, ranging from highly pathogenic to highly beneficial phenotypes (**Fig. 4**). These results  
291 are consistent with previous reports<sup>12,14,15,43</sup> and suggest that the pathogenic potential of detrimental  
292 fungal endophytes identified based on mono-association experiments with the host, is largely kept at  
293 bay in a community context by the combined action of microbiota-induced host defences and microbe-  
294 microbe competition at the soil-root interface<sup>15,44</sup>. However, we observed that robust and abundant  
295 fungal colonizers of *A. thaliana* roots defined from a continental-scale survey of the root microbiota<sup>11</sup>  
296 were dominated by detrimental fungi defined based on mono-association experiments with the host  
297 (**Fig. 4**). Based on quantitative PCR data, we also observed that fungi with beneficial activities on plant  
298 health were colonizing roots less aggressively than those with detrimental activities, suggesting a  
299 potential link between fungal colonization capabilities, abundance in natural plant populations and  
300 plant health. These results suggest that maintenance of fungal load in plant roots is critical for plant  
301 health, and that controlled fungal accommodation in plant tissues is key for the maintenance of  
302 homeostatic plant-fungal relationships. This conclusion is indirectly supported by the fact that an intact  
303 innate immune system is needed for beneficial activities of fungal root endophytes<sup>16,18</sup>. Our results  
304 therefore suggest that the most beneficial root mycobiota members are not necessarily the most  
305 abundant in roots of natural plant populations. In contrast, understanding how potential pathogens can  
306 dominate the endospheric microbiome of healthy plants is key for predicting disease emergence in  
307 natural plant populations<sup>45,46</sup>.

308 To identify genetic determinants explaining the link between colonization aggressiveness and  
309 detrimental effect on plant performance, we used different association methods that all converged into



310 the identification of the CAZyme subfamily PL1\_7 as one of the potential underlying determinants of  
311 this trait. Proteins from the PL1\_7 family were previously characterized in different *Aspergillus* species  
312 as metabolizing pectate by eliminative cleavage of (1 → 4)- $\alpha$ -D-galacturonan<sup>47,48</sup> (EC 4.2.2.2).  
313 Notably, primary cell walls of *A. thaliana* are enriched with pectin compared to those of  
314 monocotyledonous plants, which contain more hemicellulose and phenolics<sup>49,50</sup>. Therefore, repertoire  
315 diversity in pectin-degradation capabilities is likely key for penetration and accommodation in pectin-  
316 rich *A. thaliana* cell walls. This is corroborated by the observation that non-detrimental fungal  
317 endophytes were also shown to consistently induce expression of this gene family *in planta* during  
318 colonization of *A. thaliana* roots (**Fig. 5**). However, re-inspection of previously published transcriptomic  
319 data indicated that genes encoding PL1\_7 were induced more extensively *in planta* by the fungal root  
320 pathogen *Colletotrichum incanum* compared to that of its closely relative beneficial root endophyte  
321 *Colletotrichum toffeldiae*<sup>17</sup>. Therefore, differences in expression and diversification of this gene family  
322 are potential contributors to the differentiation between detrimental and non-detrimental fungi in the *A.*  
323 *thaliana* root mycobiome, especially since *Arabidopsis* cell-wall composition is a determinant factor for  
324 its disease resistance<sup>51,52</sup>. Notably, expansion of the PL1\_7 gene family was observed in plant  
325 pathogens but also in the biocontrol fungus *C. rosea* (Sordariomycetes, Hypocreales), a fungal  
326 species with mycoparasitic and plant endophytic capacity<sup>53,54</sup> that is phylogenetically closely related to  
327 multiple of our root mycobiota members. Genetic manipulation of the *C. rosea pel12* gene revealed a  
328 direct involvement of the protein in pectin degradation, but not in *C. rosea* biocontrol towards the  
329 phytopathogen *Botrytis cinerea*<sup>41</sup>. Here, we showed that heterologous overexpression of *C. rosea*  
330 *pel12* in *T. reesei* does not only increase its root colonization capabilities, but also modulates fungal  
331 impact on plant performance. We therefore conclude that a direct link exists between  
332 expression/diversification of PL1\_7-encoding genes in fungal genomes, root colonization  
333 aggressiveness, and altered plant performance. Our results suggest that evolution of fungal CAZyme  
334 repertoires modulates root mycobiota assemblages and host health in nature.

335

## 336 **Methods**

337 **Selection of 41 representative fungal strains.** The 41 *A. thaliana* root mycobiota members were  
338 previously isolated from surface-sterilized root segments of *A. thaliana* and the closely related  
339 Brassicaceae species *Arabis alpina* and *Cardamine hirsuta*, as previously described<sup>15</sup>. Notably, this  
340 culture collection derived from fungi isolated from the roots of plants grown in the Cologne Agricultural



341 Soil under greenhouse conditions, or from natural *A. thaliana* populations from two sites in Germany  
342 (Pulheim, Geyen) and on site in France (Saint-Dié, Vosges)<sup>15</sup> (**Supplementary Table 1**).

343

344 **ITS sequence comparison with naturally occurring root mycobiome.** Comparison of fungal ITS1  
345 and ITS2 sequences with corresponding sequence tags from a European-scale survey of the  
346 *A. thaliana* mycobiota (17 European sites<sup>11</sup>) was carried out. For all 41 Fungi, sequences of the  
347 internal transcribed spacer 1 and 2 (ITS1 / ITS2) were retrieved from genomes  
348 (<https://github.com/fantin-mesny/Extract-ITS-sequences-from-a-fungal-genome>) or, in the cases where  
349 no sequences could be found, via Sanger sequencing (4 of 41). All ITS sequence variants were  
350 directly aligned to the demultiplexed and quality filtered reads from previously-published datasets<sup>11</sup>  
351 using USEARCH at a 97% similarity cut-off<sup>55</sup>. A count table across all samples was constructed using  
352 the results from this mapping and an additional row representing all the reads that did not match any  
353 of the reference sequences was added. This additional row was based on the count data from the  
354 amplicon sequence variant (ASV) analysis from the original study, whereas the read counts from the  
355 new mapping were subtracted sample wise. To have coverage-independent information on the relative  
356 abundance (RA) of each fungus, we calculated RA only for the root samples where the respective  
357 fungi were found (RA > 0.01%). The sample coverage was calculated across all root samples (> 1,000  
358 reads, n = 169). Enrichment in roots was calculated for all root and soil samples (> 1,000 reads, n =  
359 169 / n = 223) using the Mann-Whitney-U test (FDR < 0.05). In order to estimate the presence of the  
360 41 fungi across worldwide collected samples, we used the GlobalFungi database<sup>20</sup>  
361 (<https://globalfungi.com/>, version August 2020). The most prevalent ITS1 sequences from each  
362 genome were used to conduct a BLAST search on the website. Sample metadata for the best  
363 matching representative species hypothesis sequences were then used to determine the global  
364 sample coverage. Appearance across samples from type 'root' was counted for each fungus and  
365 compared to the total number of root samples for each continent.

366

367 **Whole genome sequencing and annotation.** Forty-one fungal isolates from a previously-assembled  
368 culture collection<sup>15</sup> were revived from 30 % glycerol stocks stored at -80 °C. Genomic DNA extractions  
369 were carried out from mycelium samples grown on Potato extract Glucose Agar (PGA) medium, with a  
370 previously-described modified cetyltrimethylammonium bromide protocol<sup>32</sup>. Genomic DNA was  
371 sequenced using PacBio systems. Genomic DNA was sheared to 3 kb, > 10 kb, or 30 kb using using

372 Covaris LE220 or g-Tubes or Megaruptor3 (Diagenode). The sheared DNA was treated with  
373 exonuclease to remove single-stranded ends and DNA damage repair mix followed by end repair and  
374 ligation of blunt adapters using SMRTbell Template Prep Kit 1.0 (Pacific Biosciences). The library was  
375 purified with AMPure PB beads and size selected with BluePippin (Sage Science) at > 10 kb cutoff  
376 size. Sequencing was done on PacBio RSII or SEQUEL machines. For RSII sequencing, PacBio  
377 Sequencing primer was annealed to the SMRTbell template library and sequencing polymerase was  
378 bound to them. The prepared SMRTbell template libraries were sequenced on a Pacific Biosciences  
379 RSII or Sequel sequencers using Version C4 or Version 2.1 chemistry and 1 x 240 or 1 x 600  
380 sequencing movie run times, respectively. The genome assembly was generated using Falcon<sup>56</sup> with  
381 mitochondria-filtered preads. The resulting assembly was improved with finisherSC, and polished with  
382 either Quiver or Arrow. Transcriptomes were sequenced using Illumina Truseq Stranded RNA  
383 protocols with polyA selection  
384 ([http://support.illumina.com/sequencing/sequencing\\_kits/truseq\\_stranded\\_mrna\\_ht\\_sample\\_prep\\_kit.h](http://support.illumina.com/sequencing/sequencing_kits/truseq_stranded_mrna_ht_sample_prep_kit.html)  
385 [tml](http://support.illumina.com/sequencing/sequencing_kits/truseq_stranded_mrna_ht_sample_prep_kit.html)) on HiSeq2500 using HiSeq TruSeq SBS sequencing kits v4 or NovaSeq6000 using NovaSeq XP  
386 v1 reagent kits, S4 flow cell, following a 2 x 150 indexed run recipe. After sequencing, the raw fastq  
387 file reads were filtered and trimmed for quality (Q6), artifacts, spike-in and PhiX reads and assembled  
388 into consensus sequences using Trinity<sup>57</sup> v2.1.1. The genomes were annotated using the JGI  
389 Annotation pipeline<sup>58</sup>. Species assignment was conducted by extracting ITS1 and ITS2 sequences  
390 from genome assemblies, performing a similarity search against the UNITE database<sup>59</sup> and a  
391 phylogenetic comparison to fungal genomes on MycoCosm<sup>58</sup> (<https://mycocosm.jgi.doe.gov>).

392  
393 **Comparative genomics dataset.** In addition to our 41 fungal isolates from *A. thaliana* roots, we used  
394 79 previously published fungal genomes in a comparative genomics analysis (**Supplementary Table**  
395 **2**). While 77 genomes and annotations were downloaded from MycoCosm, the genome assemblies of  
396 fungal strains *Harpophora oryzae* R5-6-1<sup>23</sup> and *Helotiales* sp. F229<sup>19</sup> were downloaded from NCBI  
397 (GenBank assembly accessions GCA\_000733355.1 and GCA\_002554605.1 respectively) and  
398 annotated with FGENESH<sup>60</sup>. Lifestyles were associated to each single strain by referring to the  
399 original publications describing their isolation, and consulting the FunGuild<sup>21</sup> database with the species  
400 and genus names associated to each strain. Orthology prediction was performed on this dataset of  
401 120 genomes by running OrthoFinder v2.2.7<sup>28</sup> with default parameters. From this prediction, we used

402 the generated orthogroups data, the species tree and gene trees. OrthoFinder was also run on our 41  
403 newly-sequenced fungi to obtain a second species tree, for this subset.

404

405 **Predicting ancestral lifestyles.** To identify gene family gains and losses events and obtain  
406 reconstruction of ancestral genomes using the Sankoff approach, GLOOME<sup>29</sup> *gainLoss.VR01.266*  
407 was run using the species tree and presence/absence of each orthogroup in the 120 genomes. To  
408 associate a lifestyle to each reconstructed ancestral genome, a random forest classifier was trained on  
409 the presence/absence of each orthogroup in the 120 genomes and their associated fungal lifestyles.  
410 This was performed using the `RandomForestClassifier(random_state=0)` function of the Python library  
411 *sklearn*<sup>61</sup>. The accuracy of the model was estimated by a leave-one-out cross-validation approach,  
412 computed using the function `cross_val_score(cv=KFold(n_splits=120))` in *sklearn*. Finally, the  
413 probabilities of ancestors to belong in each lifestyle category were retrieved using function  
414 `predict_proba()`.

415

416 **Genomic feature analyses.** Statistics of genome assemblies (i.e., N50, number of genes and  
417 scaffolds and genome size) were obtained from JGI MycoCosm, and assembly-stats  
418 (<https://github.com/sanger-pathogens/assembly-stats>). Genome completeness with single copy  
419 orthologues was calculated using BUSCO v3.0.2 with default parameters<sup>62</sup>. The coverage of  
420 transposable elements in genomes was calculated and visualized using a custom pipeline Transposon  
421 Identification Nominative Genome Overview (TINGO<sup>63</sup>). The secretome was predicted as described  
422 previously<sup>34</sup>. We calculated, visualized, and compared the count and ratio of total (present in the  
423 genomes) and predicted secreted CAZymes<sup>64</sup>, proteases<sup>65</sup>, lipases<sup>66</sup>, and small secreted proteins<sup>34</sup>  
424 (SSPs) (< 300 amino acid) as a subcategory. We calculated the total count of the followings using  
425 total and predicted secreted plant cell-wall degrading enzymes (PCWDEs) and fungal cell-wall  
426 degrading enzymes (FCWDEs). Output files generated above were combined and visualised with a  
427 custom pipeline, Proteomic Information Navigated Genomic Outlook (PRINGO<sup>33</sup>). To compare the  
428 genomic compositions of the different lifestyle categories while taking into account phylogenetic signal,  
429 we first generated a matrix of pairwise phylogenetic distances between genomes using the function  
430 `tree.distance()` from package *biopython Phylo*<sup>67</sup>, then computed a principal component analysis using  
431 the `PCA(n_components=2)` function of *sklearn*<sup>61</sup>. Components PC1 and PC2 were then used to  
432 compare the per-genome numbers of CAZymes, proteases, lipases, SSPs, PCWDEs and FCWDEs in

433 the different lifestyles with an ANOVA test and a TukeyHSD post-hoc test. R function `aov` was used  
434 with the following formula specifying the model:

435 
$$\text{GeneCount} \sim \text{PC1} + \text{PC2} + \text{Lifestyle} + \text{PC1:Lifestyle} + \text{PC2:Lifestyle}.$$

436 Differences in subfamily composition of the groups of genes of interest were then carried out using a  
437 PERMANOVA-based approach (<https://github.com/fantin-mesny/Effect-Of-Biological-Categories-On-Genomes-Composition>). This approach relies on function `adonis2()` from R package *Vegan*  
438 (<https://github.com/jarioksa/vegan>) and post-hoc testing with function `pairwise.perm.manova()` from  
439 package *RVAideMemoire* (<https://cran.r-project.org/web/packages/RVAideMemoire>). We determined  
440 genes discriminating groups based on the principal coordinates of a regularized discriminant analysis  
441 calculated from the count of genes coding for CAZymes, proteases, lipases, and small secreted  
442 proteins, with R function `rda()`. We then used *Vegan* function `scores()` on the three first principal  
443 coordinates, and kept for each coordinate the top five high-loading gene discriminating groups.

444  
445  
446 **Determinants of endophytism.** To identify a small set of orthogroups that best segregate endophytes  
447 and mycobiota members from fungi with other lifestyles, we standardized the orthogroup gene counts  
448 with function `StandardScaler()` from *sklearn*<sup>61</sup>. Then, orthogroups that are enriched or depleted in the  
449 fungi of interest were selected with function `SelectFdr(f_classif, alpha=0.05)` from *sklearn*. On this  
450 subset of orthogroups, we trained a Support Vector Machine classifier with Recursive Feature  
451 Elimination (SVM-RFE). This was performed with functions from *sklearn* `SVC(kernel='linear')` and  
452 `RFECV(step=10, cv=KFold(n_splits=120, min_features_to_select=10))`, which implement a leave-one-  
453 out cross-validation allowing the estimation of the classifier accuracy at each step of the recursive  
454 orthogroup elimination. PhyloGLM models<sup>35</sup> were built on the two groups of interest and orthogroup  
455 gene counts, with parameters `btol=45` and `log.alpha.bound=7`, and the *logistic\_MPLE* method. Further  
456 analysis of the gene families segregating fungi of interest from others (n = 84) was carried out by  
457 identifying a representative sequence of each orthogroup in our SVM-RFE model, and studying both  
458 its annotation and coexpression data in databases. To identify representative sequences, all protein  
459 sequences composing an orthogroup were aligned with FAMSA<sup>68</sup> v1.6.1. Using HMMER<sup>69</sup> v3.2.1, we  
460 then built a Hidden Markov Model (HMM) from this alignment with function `hmmbuild`, then ran  
461 function `hmmsearch` looking for the best hit matching this HMM within the proteins composing our  
462 orthogroup. We then considered this best hit as a representative sequence of the orthogroup and  
463 analyzed its annotation. GO enrichment analysis was performed by running GOATOOLS<sup>36</sup> using the

464 GO annotations associated to the representative sequences. To obtain coexpression data linking the  
465 orthogroups retained in our SVM-RFE model, we searched the String-db<sup>37</sup> website for COG protein  
466 families matching our set of representative protein sequences in fungi. Each protein was associated to  
467 one COG (**Supplementary Table 3**), and coexpression data were downloaded. A coexpression  
468 network was then built on the families enriched in endophytes and mycobiota members (n = 73) and  
469 clustered with algorithm MCL (granularity = 5) using Cytoscape<sup>70</sup> v3.7.2 and clusterMaker<sup>271</sup> v1.3.1.

470

471 **Plant recolonization experiments assessing the effect of each fungal strain on plant growth. A.**

472 *thaliana* seeds were sterilized 15 min in 70 % ethanol, then 5 min in 8 % sodium hypochlorite. After 6  
473 washes in sterile double-distilled water and one wash in 10 mM MgCl<sub>2</sub>, they were stratified 5 to 7 days  
474 at 4 °C in the dark. Seed inoculation with fungal strains was carried out by crushing 50 mg of  
475 mycelium grown for 10 days on Potato extract Glucose Agar medium (PGA) in 1 ml of 10 mM MgCl<sub>2</sub>  
476 with two metal beads in a tissue lyser, then adding 10 μM of this inoculum in 250 μl of seed solution  
477 for 5 min. Seeds were then washed twice with MgCl<sub>2</sub> before seven were deposited on each medium-  
478 filled square Petri plate. Mock-inoculated seeds were also prepared by simple washes in MgCl<sub>2</sub>. The  
479 two media used in this study — 625 and 100 μM Pi — were previously-described<sup>72</sup>. They were  
480 prepared by mixing 750 μM MgSO<sub>4</sub>, 625 μM / 100 μM KH<sub>2</sub>PO<sub>4</sub>, 10,300 μM NH<sub>4</sub>NO<sub>3</sub>, 94,00 μM KNO<sub>3</sub>,  
481 1,500 μM CaCl<sub>2</sub>, 0.055 μM CoCl<sub>2</sub>, 0.053 μM CuCl<sub>2</sub>, 50 μM H<sub>3</sub>BO<sub>3</sub>, 2.5 μM KI, 50 μM MnCl<sub>2</sub>, 0.52 μM  
482 Na<sub>2</sub>MoO<sub>4</sub>, 15 μM ZnCl<sub>2</sub>, 75 μM Na-Fe-EDTA, and 1,000 μM MES pH5.5, 0μM / 525 μM KCl, then  
483 adding Difco™ Agar (ref. 214530, 1% final concentration), and finally adapting the pH to 5.5 prior to  
484 autoclaving. Plants were grown for 28 days at 21 °C, for 10 hours with light (intensity 4) at 19 °C and  
485 14 hours in the dark in growth chambers. While roots were harvested and flash-frozen, shoot fresh  
486 weight was measured for each plant. To distinguish seeds that did not germinate from plants that  
487 could not develop because of a fungal effect, we introduced a per-plate plant performance index  
488 corresponding to the average shoot fresh weight of grown plants multiplied by the proportion of grown  
489 plants. In further correlation analyses, we used plant-performance indexes normalized to mock  
490 controls (standard effect sizes) using the Hedges' g method<sup>73</sup>.

491

492 **Fungal colonization of roots assay.** Frozen root samples (one per plate) were crushed and total

493 DNA was extracted from them using a QIAGEN Plant DNEasy Kit. Fungal colonization of these root  
494 samples was then measured by quantitative PCR. For each sample, two reactions were conducted

495 with primers ITS1F (5'-CTTGGTCATTTAGAGGAAGTAA-3') and ITS2 (5'-  
496 GCTGCGTTCTTCATCGATGC-3') which target the fungal ITS1 sequence, and two with primers  
497 UBQ10F (5'-TGTTTCCGTTCTGTTATCT-3') and UBQ10R (5'-ATGTTCAAGCCATCCTTAGA-3')  
498 that target the *Ubiquitin10 A. thaliana* gene. Each reaction was performed by mixing 5 µl of iQ SYBR  
499 Green Supermix with 2 µl of 10 µM forward primer, 2 µl of 10 µM reverse primer and 1µl of water  
500 containing 1 ng template DNA. A BioRad CFX Connect Real-Time system was used with the following  
501 programme: 3 min of denaturation at 95 °C, followed by 39 cycles of 15 sec at 95 °C, 30 sec at 60 °C  
502 and 30 sec at 72 °C. We then calculated a single colonization index for each sample using the  
503 following formula:  $2^{-(\text{averageCq}(\text{ITS1})/\text{averageCq}(\text{UBQ10}))}$ .

504

505 **Confocal microscopy of root colonization by fungi.** Roots of plants grown for 28 days in mono-  
506 association with fungi were harvested and conserved in 70 % ethanol. They were then rinsed in  
507 ddH<sub>2</sub>O, and stained with propidium iodide (PI) and wheat germ agglutinin conjugated to fluorophore  
508 Biotium CF<sup>®</sup>488 (WGA-CF488). This was carried out by dipping the root samples for 15 min in a  
509 solution of 20 µg / ml PI and 10 µg / ml WGA-CF488 buffered at pH 7.4 in phosphate-buffered saline  
510 (PBS). Samples were then washed in PBS and imaged with a Zeiss LSM700 microscope.

511

512 **Plant-fungi interaction transcriptomics.** Dual RNAseq of six different plant-fungi interactions was  
513 carried out by performing plant recolonization experiments on our low Pi medium, as described above.  
514 Total roots per plates were harvested after 28 days in culture, flash frozen, and crushed in a tissue  
515 lyser, and then total RNA was extracted with a QIAGEN RNeasy Plant Mini kit. As a control condition,  
516 sterile Nucleopore Track-Etched polyester membranes were deposited on low Pi medium, then 10 µl  
517 drops of fungal inoculum (50 mg / ml of mycelium in 10 mM MgCl<sub>2</sub>) were placed on each one. The  
518 membranes were collected and processed as the root samples of our test condition. PolyA-enrichment  
519 was carried out on the RNA extracts, then an RNAseq library was prepared with the NEBNext Ultra™  
520 II Directional RNA Library Prep Kit for Illumina (New England Biolabs). Sequencing was then  
521 performed in single read mode on a HiSeq 3000 system. RNAseq reads were trimmed using  
522 Trimmomatic<sup>74</sup> and parameters TRAILING:20 AVGQUAL:20 HEADCROP:10 MINLEN:100. We then  
523 used HiSat2<sup>38</sup> v2.2.0 to map the trimmed reads onto reference genomes. Six independent HiSat2  
524 indexes were prepared, each based on the TAIR10 *Arabidopsis thaliana* genome and one of the six  
525 fungal genome assemblies of interest. We then performed six mappings, and counted the mapped



526 reads using featureCounts<sup>75</sup>. RPKM (Reads Per Kilobase Million) values were computed from the  
527 featureCounts output. Differential gene expression analyses were then carried out on these counts  
528 using DESeq2<sup>39</sup>. log2FC values were corrected by shrinkage with the algorithm *apecglm*<sup>76</sup>. To compare  
529 the transcriptomes of the six different fungi, significant log2FC values were summed per orthogroup.  
530 For each orthogroup, we used annotation of the most representative sequence, as previously  
531 described. GO enrichment analyses were carried out with GOATOOLS<sup>36</sup>, using the MycoCosm<sup>58</sup> GO  
532 annotation for fungi, and the TAIR annotation for *Arabidopsis thaliana*.

533  
534 **Determinants of detrimental effects on plants and analysis of pectate lyases.** Determinants of  
535 detrimental effects at low Pi were identified with the same method as previously described for  
536 determinants of endophytism/mycobiota: standard scaling of the orthogroup gene counts, then training  
537 of an SVM classifier with RFE and leave-one-out cross validation. Instability analysis was carried out  
538 by submitting the species tree generated by OrthoFinder<sup>28</sup> to MIPhy<sup>40</sup>, together with the gene tree of  
539 our orthogroup of interest, with default parameters. PhyloGLM<sup>35</sup> models were built on the two groups  
540 detrimental/non-detrimental and CAZyme gene counts, using our 41-genome species tree with default  
541 parameters and the *logistic\_MPLE* method. *T. reesei* strain QM9414 and three heterologous  
542 overexpression lines of *pel12* generated as described previously<sup>41</sup>, were revived on PGA medium and  
543 then inoculated into seeds for plant recolonization experiments on low Pi medium as previously  
544 described.

545  
546 **Statistics** Except for statistical methods described in the previous paragraphs, statistical testing was  
547 performed in *R* v3.5.1. Function `aov()` was used for ANOVA tests, and TukeyHSD post-hoc testing  
548 was performed using function `TukeyHSD()`. The non-parametric Kruskal-Wallis test was used by  
549 running function `kruskal.test()`, and the Dunn post-hoc test was performed with function `DunnTest()`  
550 from package DescTools (<https://github.com/Andri Signorell/DescTools/>).

551  
552 **Reporting Summary**  
553 Further information on research design is available in the Nature Research Reporting Summary linked  
554 to this article.

555  
556 **Data availability**



557 Raw and processed genome sequencing data are available at MycoCosm  
558 (<https://mycocosm.jgi.doe.gov/mycocosm/home>) and GenBank accessions will be provided upon  
559 publication. Raw and processed transcriptomic data used in our differential gene expression analysis  
560 are available at Gene Expression Omnibus: GSE169629. Scripts used for data processing and  
561 analysis are available at <https://github.com/fantin-mesny/Scripts-from-Mesny-et-al.-2021>

562

### 563 **Acknowledgements**

564 The sequencing project was funded by the U.S. Department of Energy (DOE) Joint Genome Institute,  
565 a DOE Office of Science User Facility, and supported by the Office of Science of the U.S. DOE under  
566 Contract No. DE-AC02-05CH11231 within the framework of CSP 1974 “1KFG: Deep-sequencing of  
567 ecologically-relevant Dikaria”. This work was supported by funds to S.Hac from a European Research  
568 Council starting grant (MICRORULES 758003), the ‘Priority Programme: Deconstruction and  
569 Reconstruction of the Plant Microbiota (SPP DECRyPT 2125)’ and the Cluster of Excellence on Plant  
570 Sciences (CEPLAS), both funded by the Deutsche Forschungsgemeinschaft. F.M. salary was covered  
571 by the DECRyPT 2125 programme. This research was also supported by the Laboratory of Excellence  
572 ARBRE (ANR- 11-LABX-0002-01), the Region Lorraine, the European Regional Development Fund,  
573 and the Plant–Microbe Interfaces Scientific Focus Area in the Genomic Science Program, the Office of  
574 Biological and Environmental Research in the US DOE Office of Science (to F.M.M). M.K  
575 acknowledge funding from the SLU Centre for Biological Control (CBC). The Austrian Science Fund  
576 FWF project P30460-B32 is acknowledged for funding L.A.. We would like to thank Nathan Vannier for  
577 regular discussions and ideas about data analysis and method development. Finally, we thank Paul  
578 Schulze-Lefert, Ruben Garrido-Oter, Ryohei Thomas Nakano, Gregor Langen and Rozina Kardakaris  
579 for providing helpful comments regarding the manuscript or during departmental seminars and thesis  
580 advisory committee meetings.

581

### 582 **Contributions**

583 S.Hac. and F.M.M. initiated, coordinated and supervised the project. Genomic analyses were  
584 performed by F.M., with help of S.M. who provided scripts and pipelines to annotate genomic features  
585 and generate figures describing the structure and composition of fungal genomes. Transcriptomic  
586 analyses were performed by F.M. T.T. re-analysed ITS amplicon sequencing data from natural site  
587 samples. F.M. performed all the experiments, with technical assistance from B.P.. L.A. and M.K.

588 provided fungal mutant strains used for functional validation of PL1\_7. K.W.B., S.Har., C.C., D.B.,  
589 A.L., W.A., J.P., K.L., R.R., A.C., and I.V.G. sequenced, assembled and annotated the fungal  
590 genomes. E.D. and B.He. annotated CAZymes. B.Hü. prepared RNAseq libraries and sequenced the  
591 transcriptomes used for differential gene expression analysis. F.M. and S.Hac. wrote the manuscript,  
592 with input from S.M., A.K., and F.M.M.

593

## 594 **References**

- 595 1. Martin, F.M., Uroz, S. & Barker, D.G. Ancestral alliances: Plant mutualistic symbioses with fungi  
596 and bacteria. *Science* **356**, eaad4501 (2017).
- 597 2. Nagy, L.G. *et al.* Six key traits of fungi: their evolutionary origins and genetic bases. in *The Fungal*  
598 *Kingdom* 35-56 (ASM Press, 2017).
- 599 3. Brundrett, M.C. & Tedersoo, L. Evolutionary history of mycorrhizal symbioses and global host  
600 plant diversity. *New Phytologist* **220**, 1108-1115 (2018).
- 601 4. Delavaux, C.S. *et al.* Mycorrhizal fungi influence global plant biogeography. *Nature Ecology and*  
602 *Evolution* **3**, 424-429 (2019).
- 603 5. Soudzilovskaia, N.A. *et al.* Global mycorrhizal plant distribution linked to terrestrial carbon stocks.  
604 *Nature Communications* **10**, 1-10 (2019).
- 605 6. Steidinger, B.S. *et al.* Climatic controls of decomposition drive the global biogeography of forest-  
606 tree symbioses. *Nature* **569**, 404-408 (2019).
- 607 7. Glynou, K. *et al.* The local environment determines the assembly of root endophytic fungi at a  
608 continental scale. *Environmental microbiology* **18**, 2418-2434 (2016).
- 609 8. Glynou, K., Nam, B., Thines, M. & Maciá-Vicente, J.G. Facultative root-colonizing fungi dominate  
610 endophytic assemblages in roots of nonmycorrhizal Microthlaspi species. *New Phytologist* **217**, 1190-  
611 1202 (2018).
- 612 9. U'Ren, J.M. *et al.* Host availability drives distributions of fungal endophytes in the imperilled  
613 boreal realm. *Nature Ecology and Evolution* **3**, 1430-1437 (2019).
- 614 10. Maciá-Vicente, J.G., Piepenbring, M. & Koukol, O. Brassicaceous roots as an unexpected  
615 diversity hot-spot of helotialean endophytes. *IMA Fungus* **11**, 1-23 (2020).
- 616 11. Thiergart, T. *et al.* Root microbiota assembly and adaptive differentiation among European  
617 *Arabidopsis* populations. *Nature Ecology and Evolution* **4**, 122-131 (2020).

- 618 12. Junker, C., Draeger, S. & Schulz, B. A fine line - endophytes or pathogens in *Arabidopsis*  
619 *thaliana*. *Fungal Ecology* **5**, 657-662 (2012).
- 620 13. Fesel, P.H. & Zuccaro, A. Dissecting endophytic lifestyle along the parasitism/mutualism  
621 continuum in *Arabidopsis*. *Current Opinion in Microbiology* **32**, 103-112 (2016).
- 622 14. Kia, S.H. *et al.* Influence of phylogenetic conservatism and trait convergence on the interactions  
623 between fungal root endophytes and plants. *ISME Journal* **11**, 777-790 (2017).
- 624 15. Durán, P. *et al.* Microbial Interkingdom Interactions in Roots Promote *Arabidopsis* Survival. *Cell*  
625 **175**, 973-983.e14 (2018).
- 626 16. Lahrmann, U. *et al.* Mutualistic root endophytism is not associated with the reduction of  
627 saprotrophic traits and requires a noncompromised plant innate immunity. *New Phytologist* **207**, 841-  
628 857 (2015).
- 629 17. Hacquard, S. *et al.* Survival trade-offs in plant roots during colonization by closely related  
630 beneficial and pathogenic fungi. *Nature Communications* **7**, 1-13 (2016).
- 631 18. Hiruma, K. *et al.* Root endophyte *Colletotrichum tofieldiae* confers plant fitness benefits that are  
632 phosphate status dependent. *Cell* **165**, 464-474 (2016).
- 633 19. Almario, J. *et al.* Root-associated fungal microbiota of nonmycorrhizal *Arabis alpina* and its  
634 contribution to plant phosphorus nutrition. *Proceedings of the National Academy of Sciences of the*  
635 *United States of America* **114**, E9403-E9412 (2017).
- 636 20. Větrovský, T. *et al.* GlobalFungi, a global database of fungal occurrences from high-throughput-  
637 sequencing metabarcoding studies. *Scientific Data* **7**, 1-14 (2020).
- 638 21. Nguyen, N.H. *et al.* FUNGuild: An open annotation tool for parsing fungal community datasets by  
639 ecological guild. *Fungal Ecology* **20**, 241-248 (2016).
- 640 22. Zuccaro, A. *et al.* Endophytic life strategies decoded by genome and transcriptome analyses of  
641 the mutualistic root symbiont *Piriformospora indica*. *PLoS Pathogens* **7**, e1002290-e1002290 (2011).
- 642 23. Xu, X.H. *et al.* The rice endophyte *Harpophora oryzae* genome reveals evolution from a pathogen  
643 to a mutualistic endophyte. *Scientific Reports* **4**, 1-9 (2014).
- 644 24. David, A.S. *et al.* Draft genome sequence of *Microdochium bolleyi*, a dark septate fungal  
645 endophyte of beach grass. *Genome Announcements* **4**, e00270-16 (2016).
- 646 25. Walker, A.K. *et al.* Full genome of *Phialocephala scopiformis* DAOMC 229536, a fungal  
647 endophyte of spruce producing the potent anti-insectan compound rugulosin. *Genome*  
648 *Announcements* **4**, e01768-15 (2016).

- 649 26. Wu, W. *et al.* Characterization of four endophytic fungi as potential consolidated bioprocessing  
650 hosts for conversion of lignocellulose into advanced biofuels. *Applied Microbiology and Biotechnology*  
651 **101**, 2603-2618 (2017).
- 652 27. Knapp, D.G. *et al.* Comparative genomics provides insights into the lifestyle and reveals  
653 functional heterogeneity of dark septate endophytic fungi. *Scientific Reports* **8**, 6321-6321 (2018).
- 654 28. Emms, D.M. & Kelly, S. OrthoFinder: Phylogenetic orthology inference for comparative genomics.  
655 *Genome Biology* **20**, 1-14 (2019).
- 656 29. Cohen, O., Ashkenazy, H., Belinky, F., Huchon, D. & Pupko, T. GLOOME: gain loss mapping  
657 engine. *Bioinformatics* **26**, 2914-2915 (2010).
- 658 30. Shah, F. *et al.* Ectomycorrhizal fungi decompose soil organic matter using oxidative mechanisms  
659 adapted from saprotrophic ancestors. *New Phytologist* **209**, 1705-1719 (2016).
- 660 31. Kumar, S., Stecher, G., Suleski, M. & Hedges, S.B. TimeTree: a resource for timelines, timetrees,  
661 and divergence times. *Molecular Biology and Evolution* **34**, 1812-1819 (2017).
- 662 32. Kohler, A. *et al.* Convergent losses of decay mechanisms and rapid turnover of symbiosis genes  
663 in mycorrhizal mutualists. *Nature Genetics* **47**, 410-415 (2015).
- 664 33. Miyauchi, S. *et al.* Large-scale genome sequencing of mycorrhizal fungi provides insights into the  
665 early evolution of symbiotic traits. *Nature Communications* **11**, 1-17 (2020).
- 666 34. Pellegrin, C., Morin, E., Martin, F.M. & Veneault-Fourrey, C. Comparative analysis of secretomes  
667 from ectomycorrhizal fungi with an emphasis on small-secreted proteins. *Frontiers in Microbiology* **6**,  
668 1278-1278 (2015).
- 669 35. Tung Ho, L.s. & Ané, C. A linear-time algorithm for gaussian and non-gaussian trait evolution  
670 models. *Systematic Biology* **63**, 397-408 (2014).
- 671 36. Klopfenstein, D.V. *et al.* GOATOOLS: A Python library for Gene Ontology analyses. *Scientific*  
672 *Reports* **8**, 1-17 (2018).
- 673 37. Szklarczyk, D. *et al.* STRING v11: Protein-protein association networks with increased coverage,  
674 supporting functional discovery in genome-wide experimental datasets. *Nucleic Acids Research* **47**,  
675 D607-D613 (2019).
- 676 38. Kim, D., Paggi, J.M., Park, C., Bennett, C. & Salzberg, S.L. Graph-based genome alignment and  
677 genotyping with HISAT2 and HISAT-genotype. *Nature Biotechnology* **37**, 907-915 (2019).
- 678 39. Love, M.I., Huber, W. & Anders, S. Moderated estimation of fold change and dispersion for RNA-  
679 seq data with DESeq2. *Genome Biology* **15**, 550-550 (2014).

- 680 40. Curran, D.M., Gilleard, J.S. & Wasmuth, J.D. MIPhy: Identify and quantify rapidly evolving  
681 members of large gene fam. *PeerJ* **2018**, e4873-e4873 (2018).
- 682 41. Atanasova, L. *et al.* Evolution and functional characterization of pectate lyase PEL12, a member  
683 of a highly expanded *Clonostachys rosea* polysaccharide lyase 1 family. *BMC Microbiology* **18**, 1-19  
684 (2018).
- 685 42. Weiß, M., Waller, F., Zuccaro, A. & Selosse, M.A. Sebacinales – one thousand and one  
686 interactions with land plants. *New Phytologist* **211**, 20-40 (2016).
- 687 43. Keim, J., Mishra, B., Sharma, R., Ploch, S. & Thines, M. Root-associated fungi of *Arabidopsis*  
688 *thaliana* and *Microthlaspi perfoliatum*. *Fungal Diversity* **66**, 99-111 (2014).
- 689 44. Vannier, N., Agler, M. & Hacquard, S. Microbiota-mediated disease resistance in plants. *PLOS*  
690 *Pathogens* **15**, e1007740-e1007740 (2019).
- 691 45. Karasov, T.L. *et al.* *Arabidopsis thaliana* and *Pseudomonas* Pathogens Exhibit Stable  
692 Associations over Evolutionary Timescales. *Cell Host and Microbe* **24**, 168-179.e4 (2018).
- 693 46. Karasov, T.L. *et al.* The relationship between microbial population size and disease in the  
694 *Arabidopsis thaliana* phyllosphere. *bioRxiv* (2020).
- 695 47. Benen, J.A.E., Kester, H.C.M., Pařenicová, L. & Visser, J. Characterization of *Aspergillus niger*  
696 pectate lyase A. *Biochemistry* **39**, 15563-15569 (2000).
- 697 48. Bauer, S., Vasu, P., Persson, S., Mort, A.J. & Somerville, C.R. Development and application of a  
698 suite of polysaccharide-degrading enzymes for analyzing plant cell walls. *Proceedings of the National*  
699 *Academy of Sciences of the United States of America* **103**, 11417-11422 (2006).
- 700 49. Bacic, A. Breaking an impasse in pectin biosynthesis. *Proceedings of the National Academy of*  
701 *Sciences* **103**, 5639-5640 (2006).
- 702 50. Vogel, J. Unique aspects of the grass cell wall. *Current Opinion in Plant Biology* **11**, 301-307  
703 (2008).
- 704 51. Bacete, L. *et al.* *Arabidopsis* response reGULator 6 (ARR6) modulates plant cell-wall composition  
705 and disease resistance. *Molecular Plant-Microbe Interactions* **33**, 767-780 (2020).
- 706 52. Molina, A. *et al.* *Arabidopsis* cell wall composition determines disease resistance specificity and  
707 fitness. *Proceedings of the National Academy of Sciences of the United States of America* **118**, 2021-  
708 2021 (2021).
- 709 53. Sun, Z.-B. *et al.* Biology and applications of *Clonostachys rosea*. *Journal of Applied Microbiology*  
710 **129**, 486-495 (2020).

- 711 54. Broberg, M. *et al.* Comparative genomics highlights the importance of drug efflux transporters  
712 during evolution of mycoparasitism in *Clonostachys* subgenus *Bionectria* (Fungi, Ascomycota,  
713 Hypocreales). *Evolutionary Applications* **14**, 476-497 (2021).
- 714 55. Edgar, R.C. Search and clustering orders of magnitude faster than BLAST. *Bioinformatics* **26**,  
715 2460-2461 (2010).
- 716 56. Chin, C.S. *et al.* Phased diploid genome assembly with single-molecule real-time sequencing.  
717 *Nature Methods* **13**, 1050-1054 (2016).
- 718 57. Grabherr, M.G. *et al.* Full-length transcriptome assembly from RNA-Seq data without a reference  
719 genome. *Nature Biotechnology* **29**, 644-652 (2011).
- 720 58. Grigoriev, I.V. *et al.* MycoCosm portal: Gearing up for 1000 fungal genomes. *Nucleic Acids*  
721 *Research* **42**, D699-D704 (2014).
- 722 59. Nilsson, R.H. *et al.* The UNITE database for molecular identification of fungi: Handling dark taxa  
723 and parallel taxonomic classifications. *Nucleic Acids Research* **47**, D259-D264 (2019).
- 724 60. Solovyev, V., Kosarev, P., Seledsov, I. & Vorobyev, D. Automatic annotation of eukaryotic genes,  
725 pseudogenes and promoters. *Genome biology* **7 Suppl 1**, S10-S10 (2006).
- 726 61. Pedregosa, F. *et al.* Scikit-learn: machine learning in Python. *Journal of Machine Learning*  
727 *Research* **12**, 2825-2830 (2011).
- 728 62. Seppey, M., Manni, M. & Zdobnov, E.M. BUSCO: Assessing Genome Assembly and Annotation  
729 Completeness. in *Methods in Molecular Biology* 227-245 (Springer New York, 2019).
- 730 63. Morin, E. *et al.* Comparative genomics of *Rhizophagus irregularis*, *R. cerebriforme*, *R. diaphanus*  
731 and *Gigaspora rosea* highlights specific genetic features in Glomeromycotina. *New Phytologist* **222**,  
732 1584-1598 (2019).
- 733 64. Cantarel, B.I. *et al.* The Carbohydrate-Active EnZymes database (CAZy): An expert resource for  
734 glycogenomics. *Nucleic Acids Research* **37**, 233-238 (2009).
- 735 65. Rawlings, N.D., Barrett, A.J. & Finn, R. Twenty years of the MEROPS database of proteolytic  
736 enzymes, their substrates and inhibitors. *Nucleic Acids Research* **44**, D343-D350 (2016).
- 737 66. Fischer, M. The Lipase Engineering Database: a navigation and analysis tool for protein families.  
738 *Nucleic Acids Research* **31**, 319-321 (2003).
- 739 67. Cock, P.J.A. *et al.* Biopython: freely available Python tools for computational molecular biology  
740 and bioinformatics. *Bioinformatics* **25**, 1422-1423 (2009).

741 68. Deorowicz, S., Debudaj-Grabysz, A. & Gudys, A. FAMSA: Fast and accurate multiple sequence  
742 alignment of huge protein families. *Scientific Reports* **6**, 1-13 (2016).

743 69. Eddy, S.R. Accelerated profile HMM searches. *PLoS Computational Biology* **7**(2011).

744 70. Shannon, P. *et al.* Cytoscape: A software Environment for integrated models of biomolecular  
745 interaction networks. *Genome Research* **13**, 2498-2504 (2003).

746 71. Morris, J.H. *et al.* ClusterMaker: A multi-algorithm clustering plugin for Cytoscape. *BMC*  
747 *Bioinformatics* **12**, 436-436 (2011).

748 72. Gruber, B.D., Giehl, R.F.H., Friedel, S. & von Wirén, N. Plasticity of the Arabidopsis root system  
749 under nutrient deficiencies. *Plant Physiology* **163**, 161-179 (2013).

750 73. Hedges, L.V. Distribution Theory for Glass's Estimator of Effect size and Related Estimators.  
751 *Journal of Educational Statistics* **6**, 107-128 (1981).

752 74. Bolger, A.M., Lohse, M. & Usadel, B. Trimmomatic: a flexible trimmer for Illumina sequence data.  
753 *Bioinformatics* **30**, 2114-2120 (2014).

754 75. Liao, Y., Smyth, G.K. & Shi, W. featureCounts: an efficient general purpose program for assigning  
755 sequence reads to genomic features. *Bioinformatics* **30**, 923-930 (2014).

756 76. Zhu, A., Ibrahim, J.G. & Love, M.I. Heavy-tailed prior distributions for sequence count data:  
757 removing the noise and preserving large differences. *Bioinformatics* **35**, 2084-2092 (2019).

758

759

760

761

762

763

764

765

766

767

768

769

770

771



772 **Main Figures**

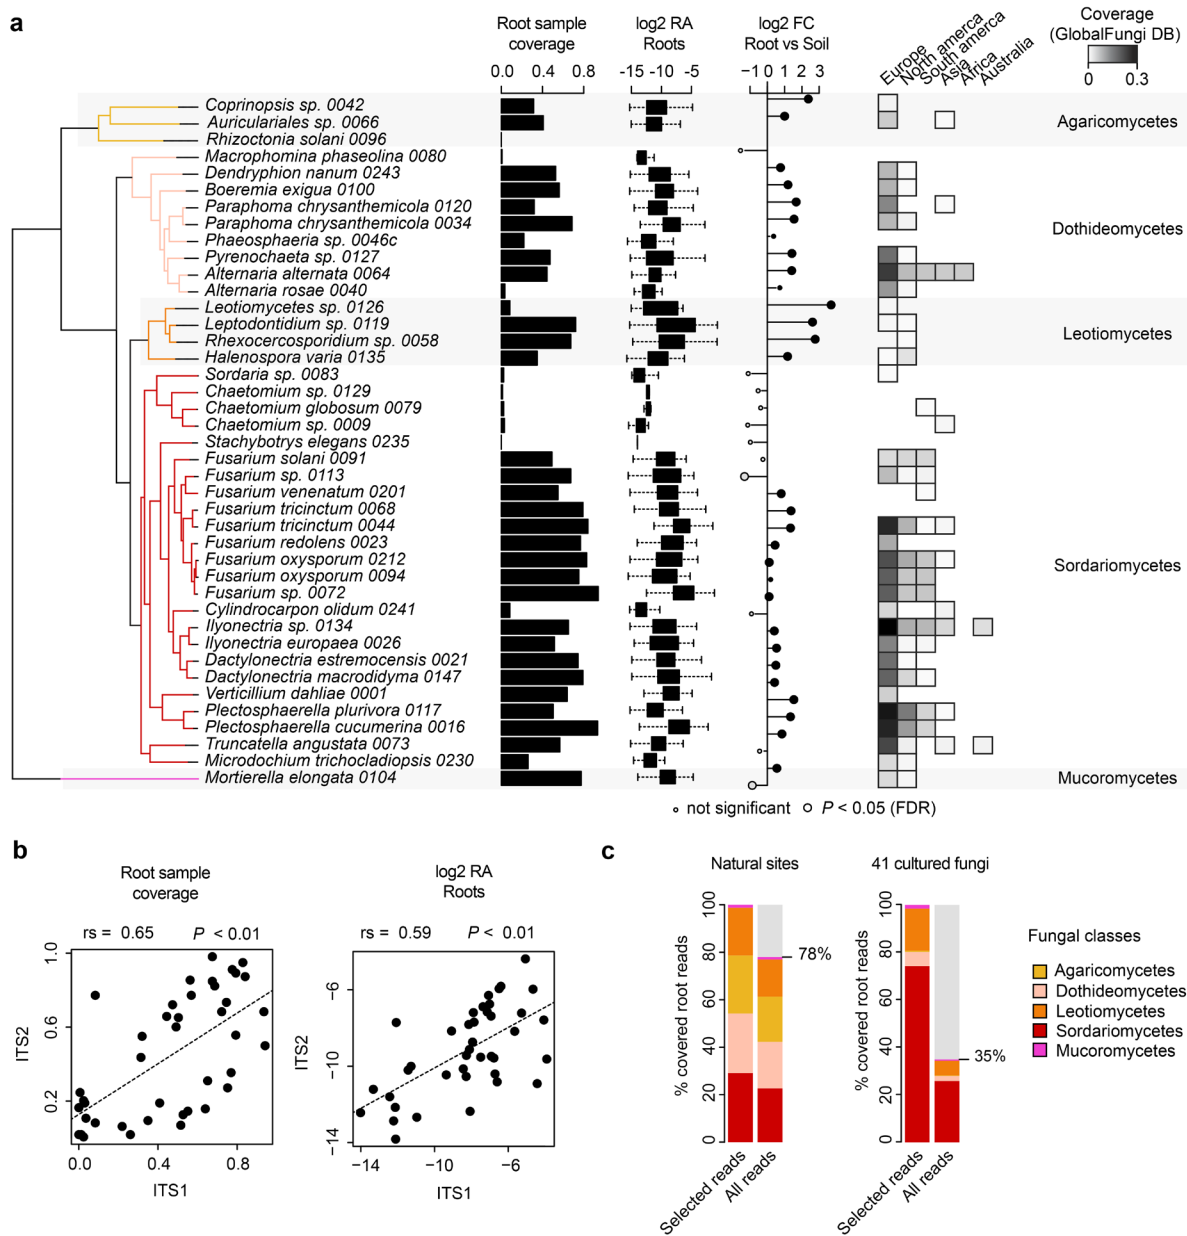

773

774 **Fig. 1: Prevalence and abundance profiles of 41 root-colonizing fungi across naturally**

775 **occurring *A. thaliana* root mycobiomes.** a, Species names and phylogenetic relationships among

776 the 41 selected fungi. Estimated prevalence (i.e., root sample coverage, bar-plots), relative abundance

777 (RA, log2 transformed, box-plots), and enrichment signatures (log2FC, circles) were calculated for

778 each fungus based on data from a previously published continental-scale survey of the *A. thaliana* root

779 mycobiota<sup>11</sup>. ITS1 tags from natural site samples were directly mapped against the reference ITS1

780 sequences of the selected fungi. Sample coverage in roots was computed based on n = 169 root

781 samples and estimated RA were calculated for root samples having a positive hit only. Log2FC in RA

782 between root (n = 169) and soil samples (n = 223) is shown based on the mean RA measured across

783 samples and significant differences are indicated by circle sizes (Mann-Whitney-U test, FDR < 0.05).  
784 ITS1 sequence coverage measured across 3,582 root samples retrieved from the GlobalFungi<sup>20</sup>. Note  
785 that samples were analysed separately by continent. **b**, Correlation between root sample coverage  
786 (left panel) measured in ITS1 (n = 169) and ITS2 (n = 158) datasets for each of the 41 fungi (n = 41,  
787 Spearman's rank correlation). Right panel: same correlation but based log<sub>2</sub> RA values (n = 41,  
788 Spearman's rank correlation). **c**, Distribution of root samples from the European transect across five  
789 classes of fungi, for ASVs (left panel) and the 41 fungal genomes (right panel). "Selected reads" refer  
790 to read distribution across the five fungal classes only, whereas "all reads" refer to read distribution  
791 across all sequenced reads.

792

793

794

795

796

797

798

799

800

801

802

803

804

805

806

807

808

809

810

811

812

813

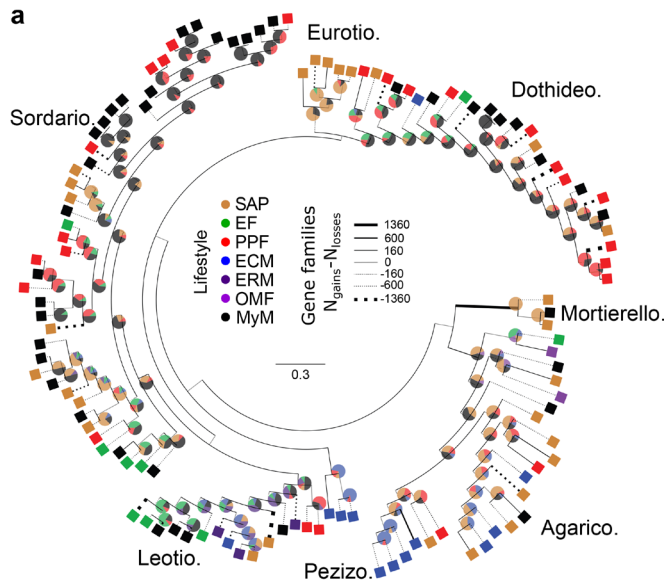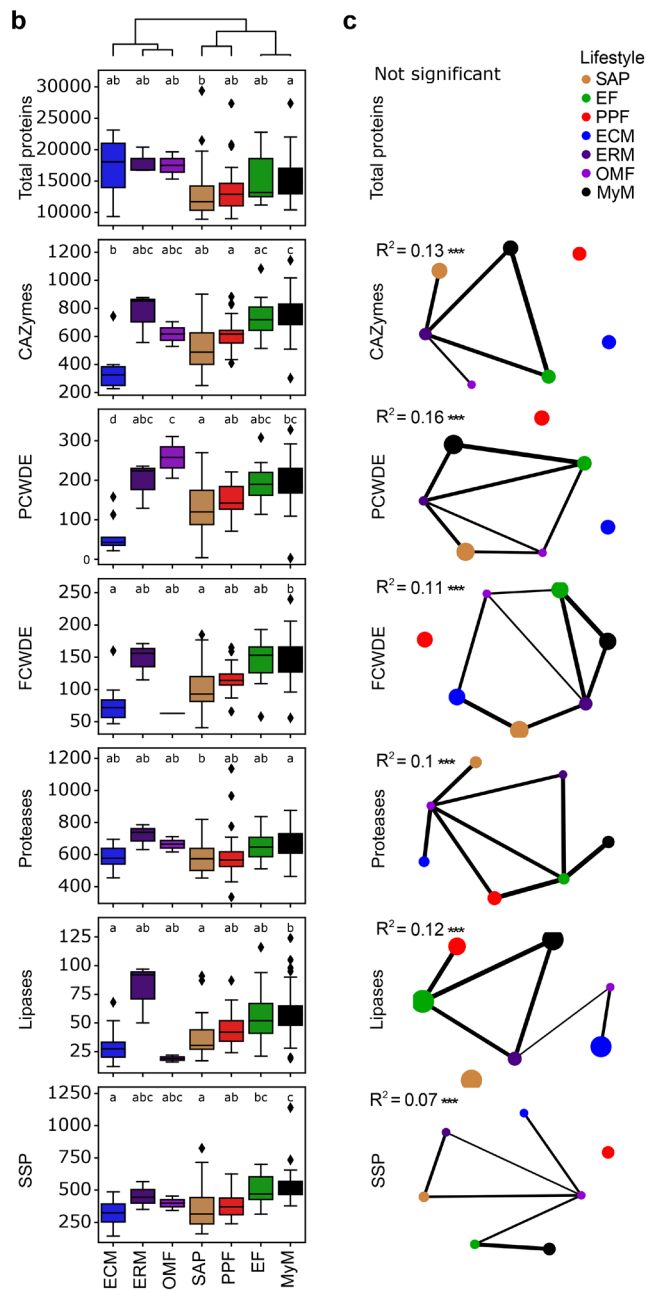

815 **Fig. 2: Ancestral relationships and trait convergence across root-colonizing fungal**  
816 **endophytes. a**, Lifestyle-annotated whole genome phylogeny of the 41 selected mycobiota members  
817 (MyM, black) and 79 published fungal genomes (SAP: Saprotrophs, EF: Endophytic Fungi, PPF: Plant  
818 Pathogenic Fungi, ECM: Ectomycorrhiza, ERM: Ericoid Mycorrhiza, OMF: Orchid Mycorrhizal Fungi).  
819 Pie charts on ancestor nodes show lifestyle probabilities of each ancestor, as identified by a Random  
820 Forest model trained on genome compositions in gene families ( $R^2 = 0.56$ ). Branch width is  
821 proportional to the gene family gains-losses difference ( $N_{\text{gains}} - N_{\text{losses}}$ ). Line is dotted when this  
822 difference is negative. **b**, Genomic counts of genes involved in fungal-host/environment associations  
823 (CAZymes: Carbohydrate-Active Enzymes, PCWDEs: Plant Cell-Wall Degrading Enzyme, FCWDEs:  
824 Fungal Cell-Wall Degrading Enzyme, SSPs: Small Secreted Proteins; PCWDEs and FCWDEs are  
825 CAZyme subsets). Boxes are grouped according to UPGMA hierarchical clustering on mean counts  
826 over the different categories. ANOVA-statistical testing (Counts~PhylogenyPCs+Lifestyle, **Methods**)  
827 identified both phylogeny and lifestyles as having an effect on genomic contents, letters result from  
828 post-hoc TukeyHSD testing. **c**, Networks showing the results of a PERMANOVA-based comparison of  
829 gene repertoires (JaccardDistances~Phylogeny+Lifestyle). Networks for each category are labelled  
830 with Lifestyle  $R^2$  values. \*\*\*  $P < 0.001$  (see **Extended Data Fig. 4**). Lifestyles are connected if their  
831 gene compositions are not significantly different. Node size is proportional to the area of one lifestyle's  
832 ordination ellipse on a Jaccard-derived PCoA plot, and reflects the intra-lifestyle variability. Edge  
833 weights and widths are inversely proportional to the distance between ordination ellipse centroids.

834  
835  
836  
837  
838  
839  
840  
841  
842  
843  
844  
845

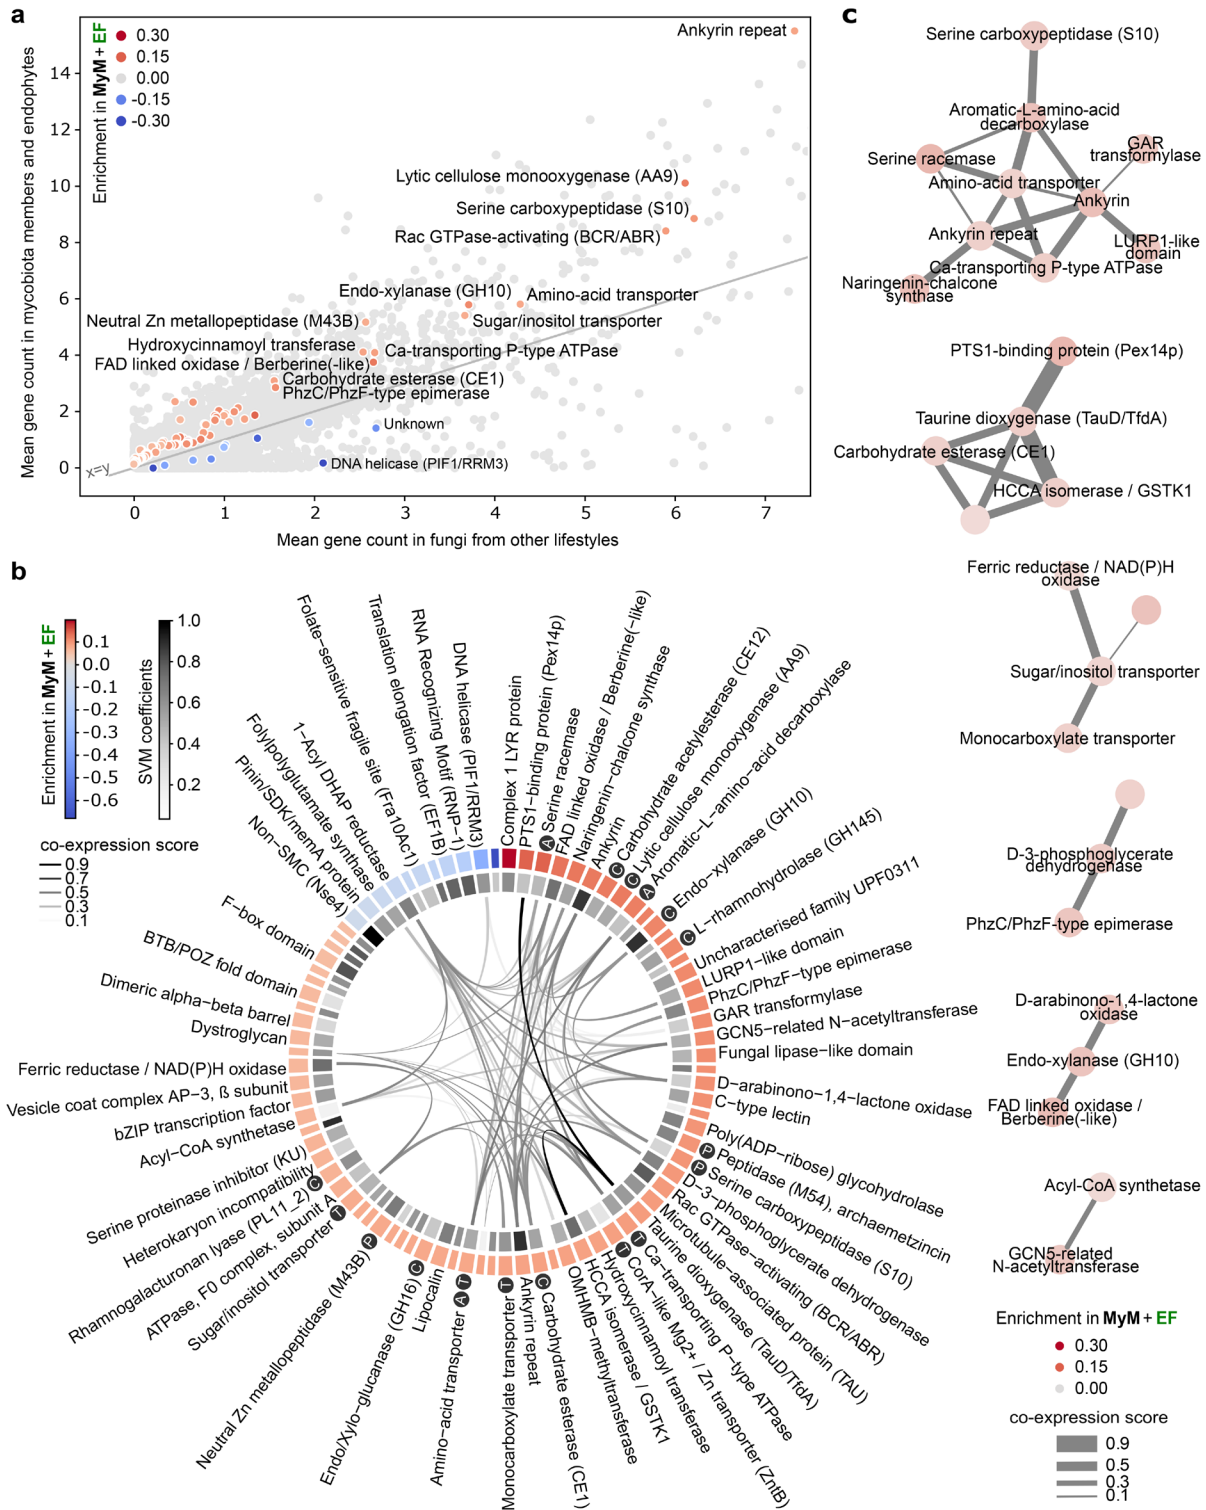

846

847

848 **Fig. 3: Minimal set of 84 gene families discriminating mycobiota members and endophytes**

849 **from other lifestyles. a**, Scatterplot showing the mean per-genome copy number of each orthogroup

850 in mycobiota members and endophytes, in comparison to other lifestyles. Light grey: all 41,612

851 orthogroups. The 84 discriminant orthogroups identified by SVM-RFE ( $R^2 = 0.8$ ) are highlighted in a

852 gradient of red or blue colours reflecting, respectively, enrichment or depletion in *A. thaliana*

853 mycobiota members and endophytes (MyM + EF) compared to the other fungal lifestyles. **b**,  
854 Functional descriptions of the 84 discriminant orthogroups. This gene set is enriched in CAZymes  
855 (Fisher,  $P < 0.05$  - labelled C) and also contains peptidases (labelled P), transporters (labelled T) and  
856 proteins involved in amino-acid metabolism (labelled A). The outer circle shows orthogroup  
857 enrichment/depletion as described in panel (a). The inner circle depicts the SVM coefficients,  
858 reflecting the contribution of each orthogroup to lifestyle differentiation. In the centre, links between  
859 orthogroups indicate coexpression of associated COG families in fungi (STRING database<sup>37</sup>). **c**,  
860 Coexpression network of gene families across published fungal transcriptomic datasets, built on  
861 discriminant orthogroups enriched in endophytes and mycobiota members and clustered with the MCL  
862 method.

863

864

865

866

867

868

869

870

871

872

873

874

875

876

877

878

879

880

881

882

883



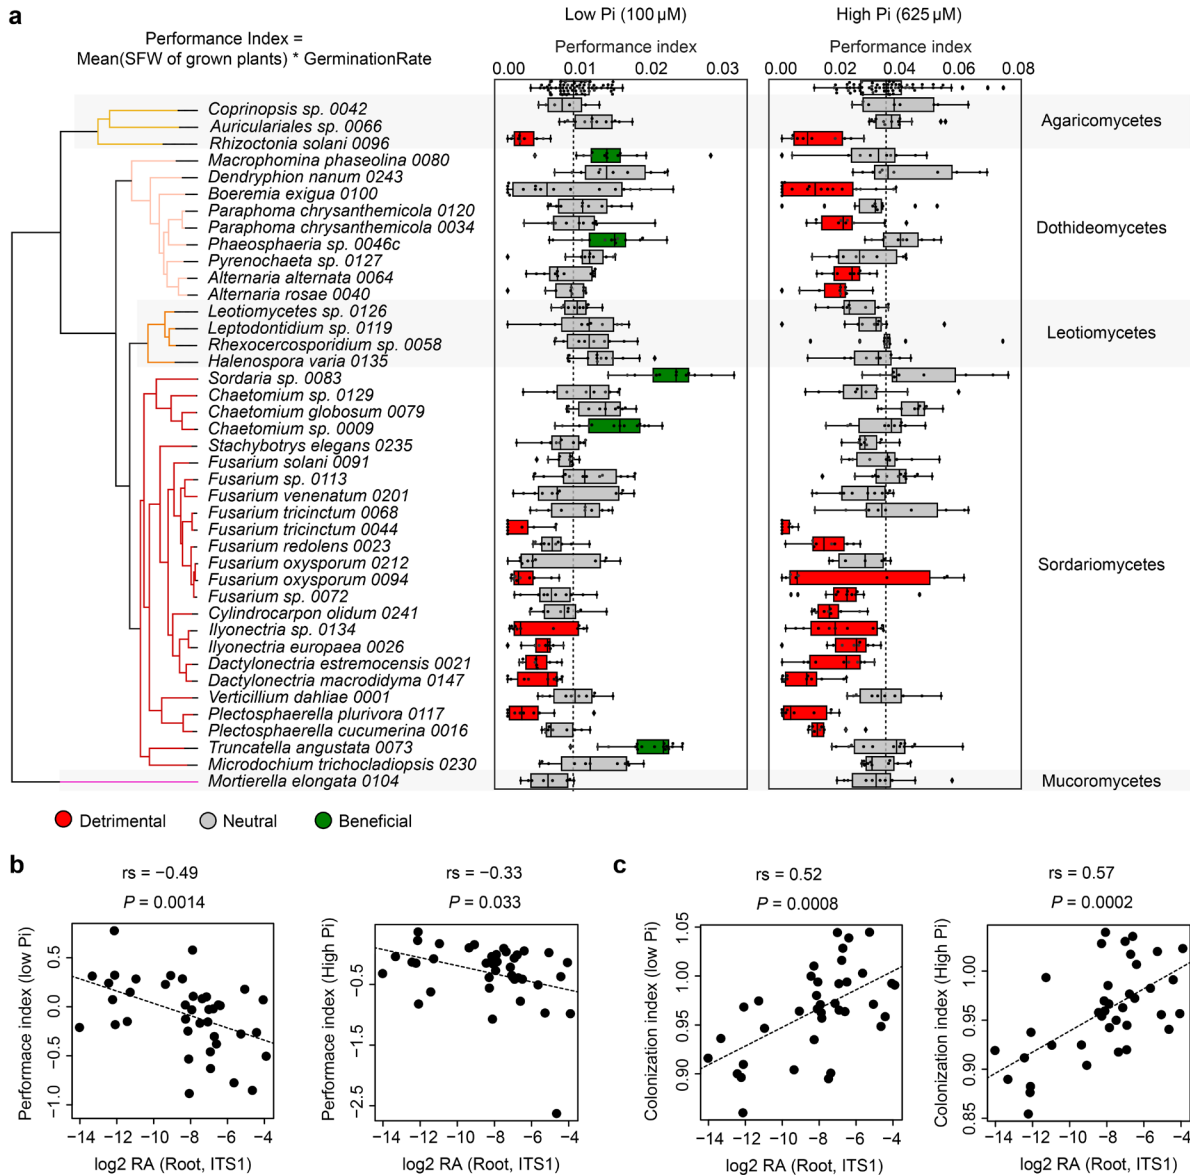

884

885

886 **Fig. 4: Linking fungal outcome on host performance with root colonization patterns. a,**

887 Performance indices (shoot fresh weights of 4-week-old plants normalized by germination rate) of *A.*

888 *thaliana* plants recolonized with each of the 41 fungal strains on media containing low and high

889 concentrations of orthophosphate (Pi). Differential fungal effects on plant performance were tested on

890 both media with Kruskal-Wallis ( $P < 0.05$ ) and beneficial and pathogenic strains were identified by a

891 Dunn test against mock-treated plants (first row in boxplots). **b,** Spearman rank correlation of relative

892 fungal abundances in root samples from natural populations<sup>11</sup> (log<sub>2</sub> RA, see **Fig. 1a**) with fungal

893 effects on plant performance at low Pi (left) and high Pi (right) (Hedges standard effect sizes

894 standardizing all phenotypes to the ones of mock-treated plants). **c,** Spearman rank correlation of

895 relative fungal abundances in root samples from natural populations<sup>11</sup> (log<sub>2</sub> RA, see **Fig. 1a**) with



896 fungal colonization indices measured by quantitative PCR in our plant recolonization experiments at  
897 low Pi (left) and high Pi (right).

898

899

900

901

902

903

904

905

906

907

908

909

910

911

912

913

914

915

916

917

918

919

920

921

922

923

924

925

926

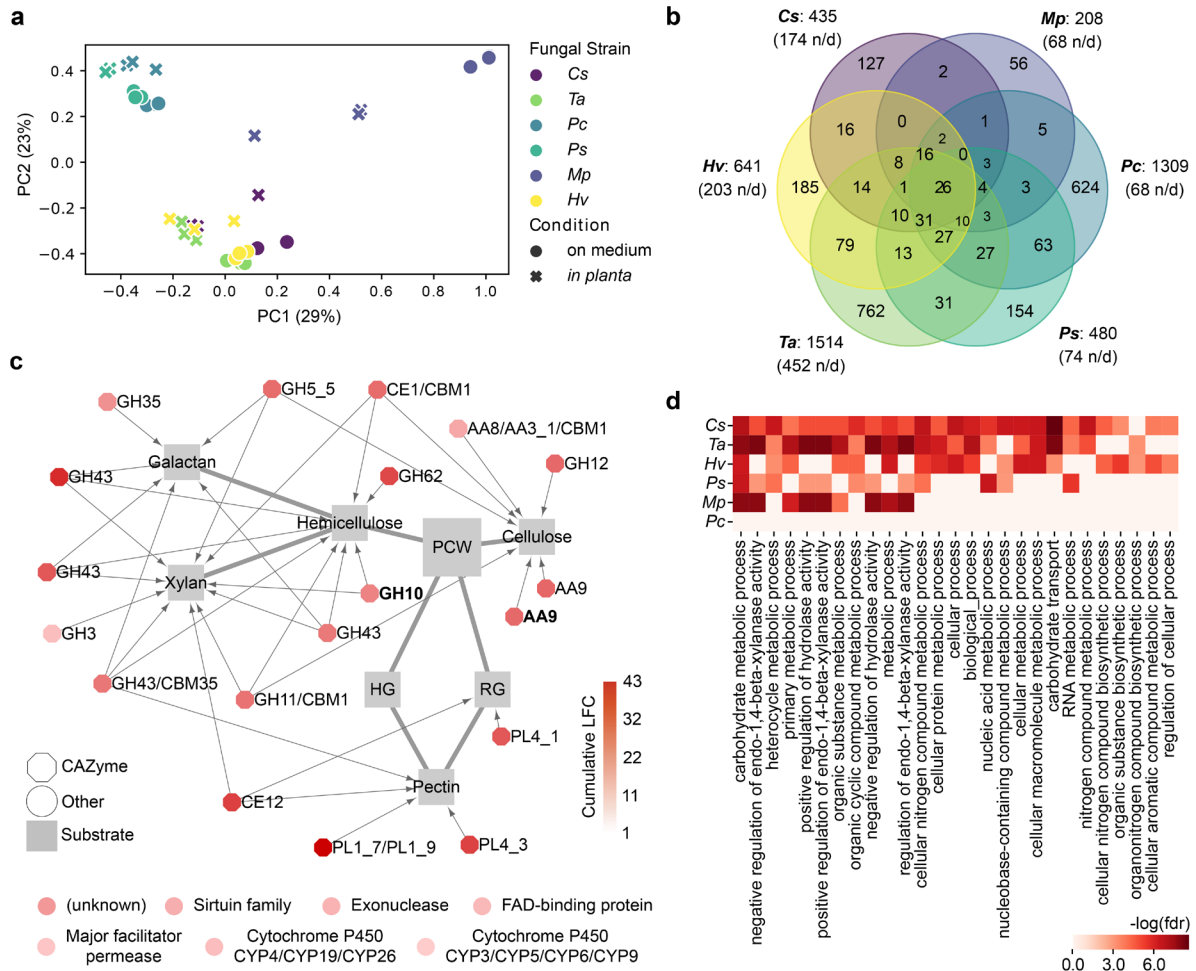

927

928

929 **Fig. 5: Comparative transcriptomics identified a core set of PCWDE-encoding genes induced**

930 **in *A. thaliana* roots by diverse mycobiota members.** **a**, PCoA plot of Bray-Curtis distances

931 calculated on gene family read counts from fungal transcriptome data on medium and *in planta*. Cs =

932 *Chaetomium sp. 0009*, Mp = *Macrophomina phaseolina 0080*, Pc = *Paraphoma chrysantemicola*

933 *0034*, Ps = *Phaeosphaeria sp. 0046c*, Ta = *Truncatella angustata 0073*, Hv = *Halenospora varia 0135*.

934 **b**, Venn diagram showing the number of fungal gene families over-expressed *in planta*. Note the 26

935 families commonly over-expressed by all six fungi (n/d: non-displayed interactions). **c**, Commonly

936 over-expressed gene families *in planta* (n = 26), which include 19 plant cell-wall degrading CAZymes

937 (octagons) linked to their substrates, as described in literature<sup>33,64</sup>. The two CAZyme families

938 highlighted in bold were identified as potential determinants of endophytism (SVM-RFE, see **Fig. 3a**).

939 The seven remaining (non-CAZyme) families are shown below the network. **d**, Individual GO

940 enrichment analyses performed on the genes over-expressed *in planta* vs. on medium by each fungal

941 strain (GOATOOLS, FDR < 0.05).

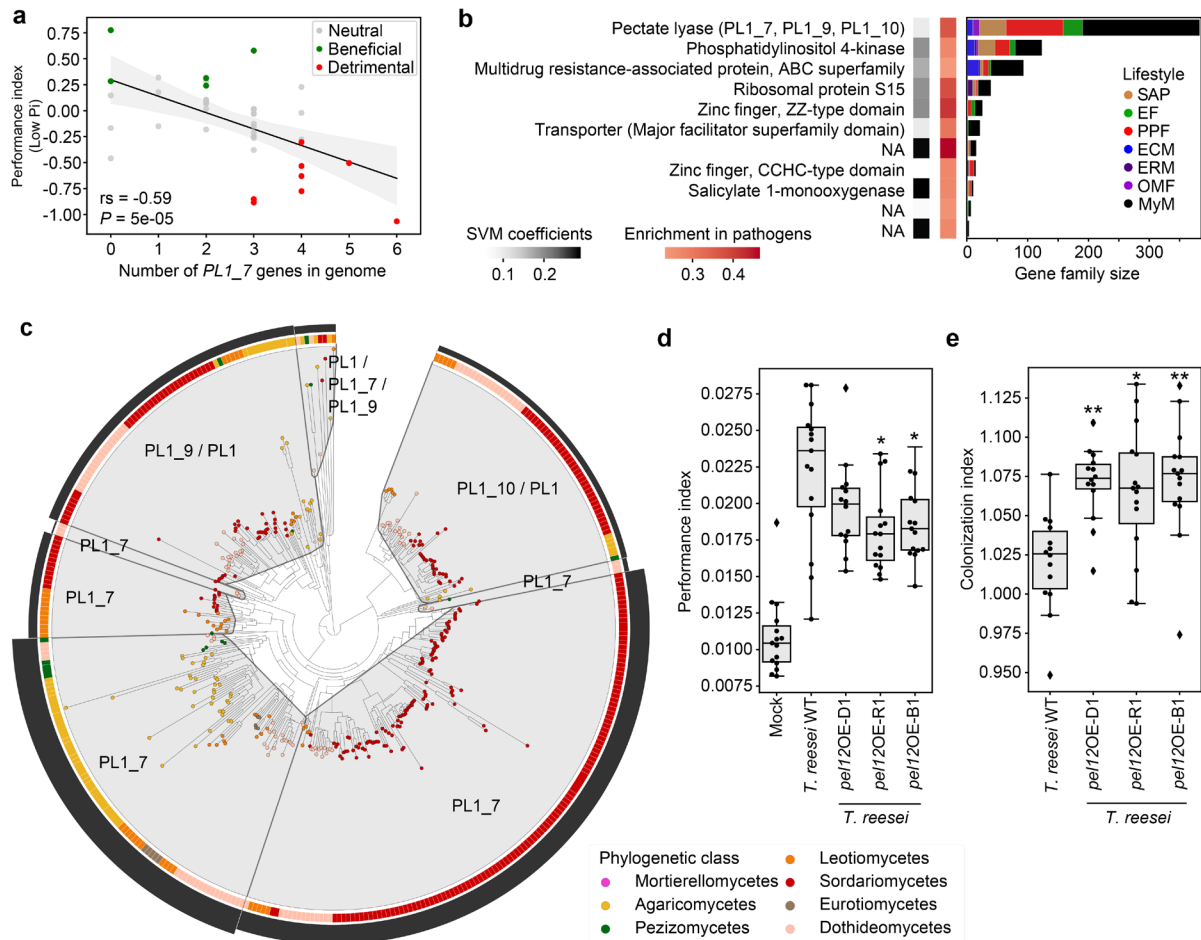

942

943

944 **Fig. 6: Genomic content in polysaccharide lyase PL1\_7 links colonization aggressiveness to**

945 **plant health. a**, Spearman correlation between the number of genes encoding secreted PL1\_7 in

946 fungal genomes and the plant performance index at low Pi in recolonization experiments. **b**, Minimal

947 set of 11 gene families discriminating detrimental from non-detrimental fungi at low Pi (SVM-RFE  $R^2 =$

948 0.88). The first vertical stripe shows the enrichment of these gene families in fungi identified as

949 detrimental in recolonization experiments at low Pi, whereas the second shows the SVM coefficients,

950 reflecting the contribution of each orthogroup to the separation of the two groups. Gene family sizes

951 and representation in the different lifestyles are shown on the barplots in the context of the whole

952 fungal dataset ( $n = 120$ ). NA: no functional annotation. **c**, Protein family tree of the polysaccharide

953 lyase orthogroup identified as essential for segregating detrimental from non-detrimental fungi in our

954 SVM-RFE classification model. The tree was reconciled with fungal phylogeny and clustered into

955 minimum instability groups by MIPhy<sup>40</sup>. Each group is labelled with its CAZyme annotation. The outer

956 circle (black barplot) depicts the relative instabilities of these groups, suggesting two rapidly evolving

957 PL1\_7 groups in Sordariomycetes and Agaricomycetes. **d**, Plant performance indices resulting from

958 plant recolonization experiments at low Pi, conducted with *Trichoderma reesei* QM9414 (WT) and  
959 three independent heterologous mutant lines (D1, R1, B1) overexpressing *pel12* from *Clonostachys*  
960 *rosea* (PL1\_7 family<sup>41</sup>). Asterisks indicate significant difference to *T. reesei* WT, according to ANOVA  
961 and TukeyHSD test. **e**, Fungal colonization measured by qPCR in colonized roots at low Pi, conducted  
962 with *T. reesei* WT and three *pel12* overexpression mutant lines. Asterisks indicate significant  
963 difference to *T. reesei* WT, according to a Kruskal-Wallis and a Dunn test.

964

965

966

967

968

969

970

971

972

973

974

975

976

977

978

979

980

981

982

983

984

985

986

987

988

989 **Extended data figures**

990

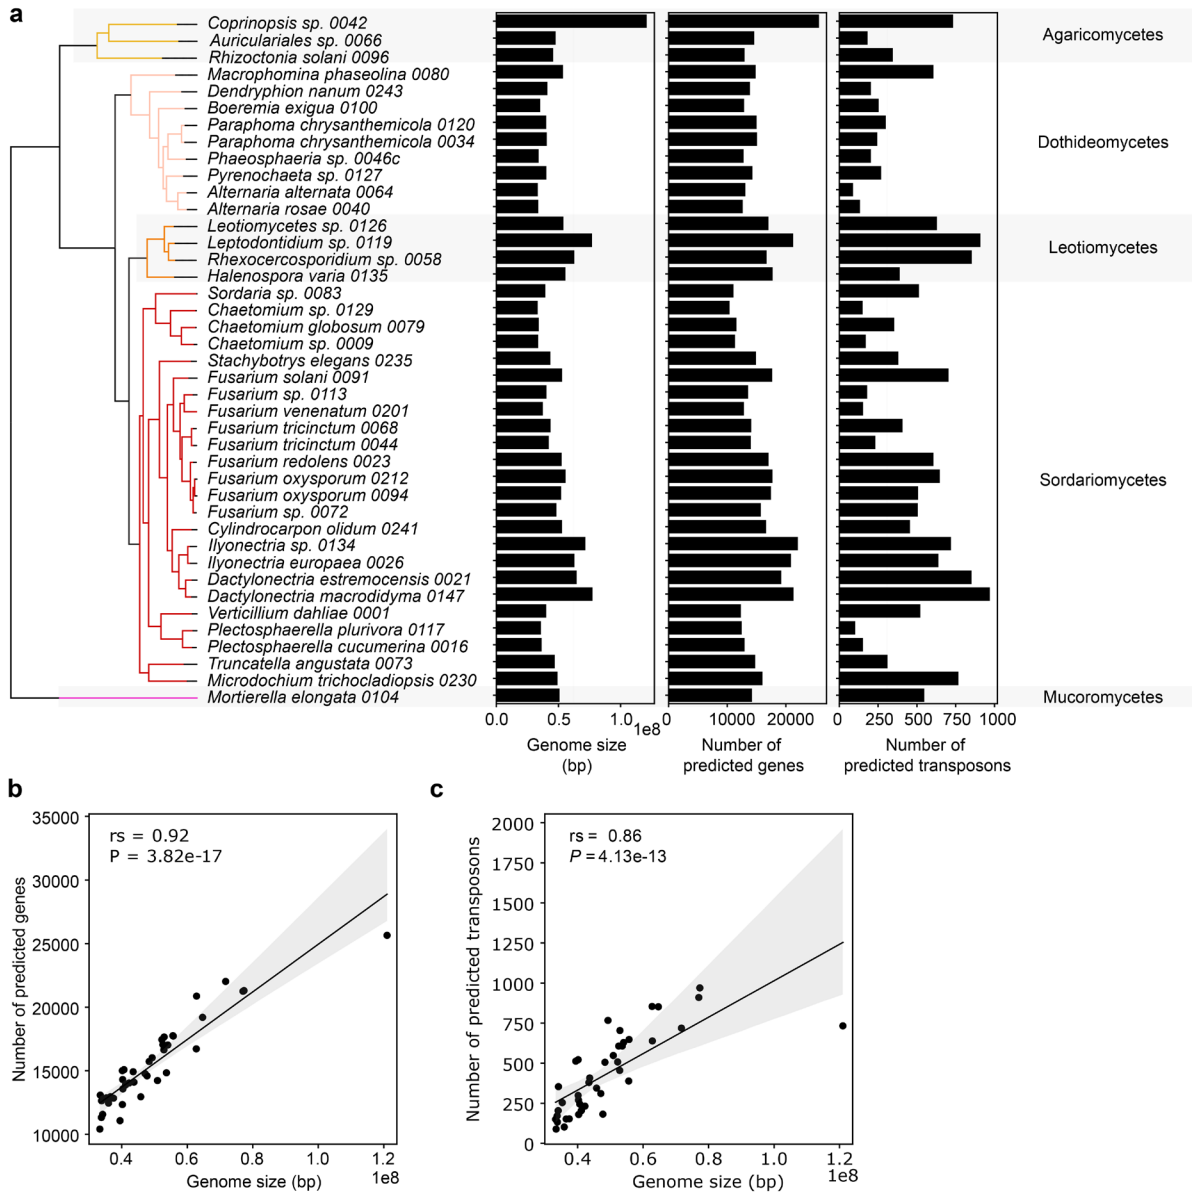

991

992

993 **Extended Data Fig. 1: Link between genome size, number of genes and number of transposons**

994 **across the 41 newly-sequenced fungal strains. a, Genome assembly size, number of predicted**

995 **genes and number of identified transposons in the genomes of the 41 *A. thaliana* mycobiota members.**

996 **b, Spearman's correlation between genome size and number of predicted genes. c, Spearman's**

997 **correlation between genome size and number of predicted transposable elements.**

998

999

1000

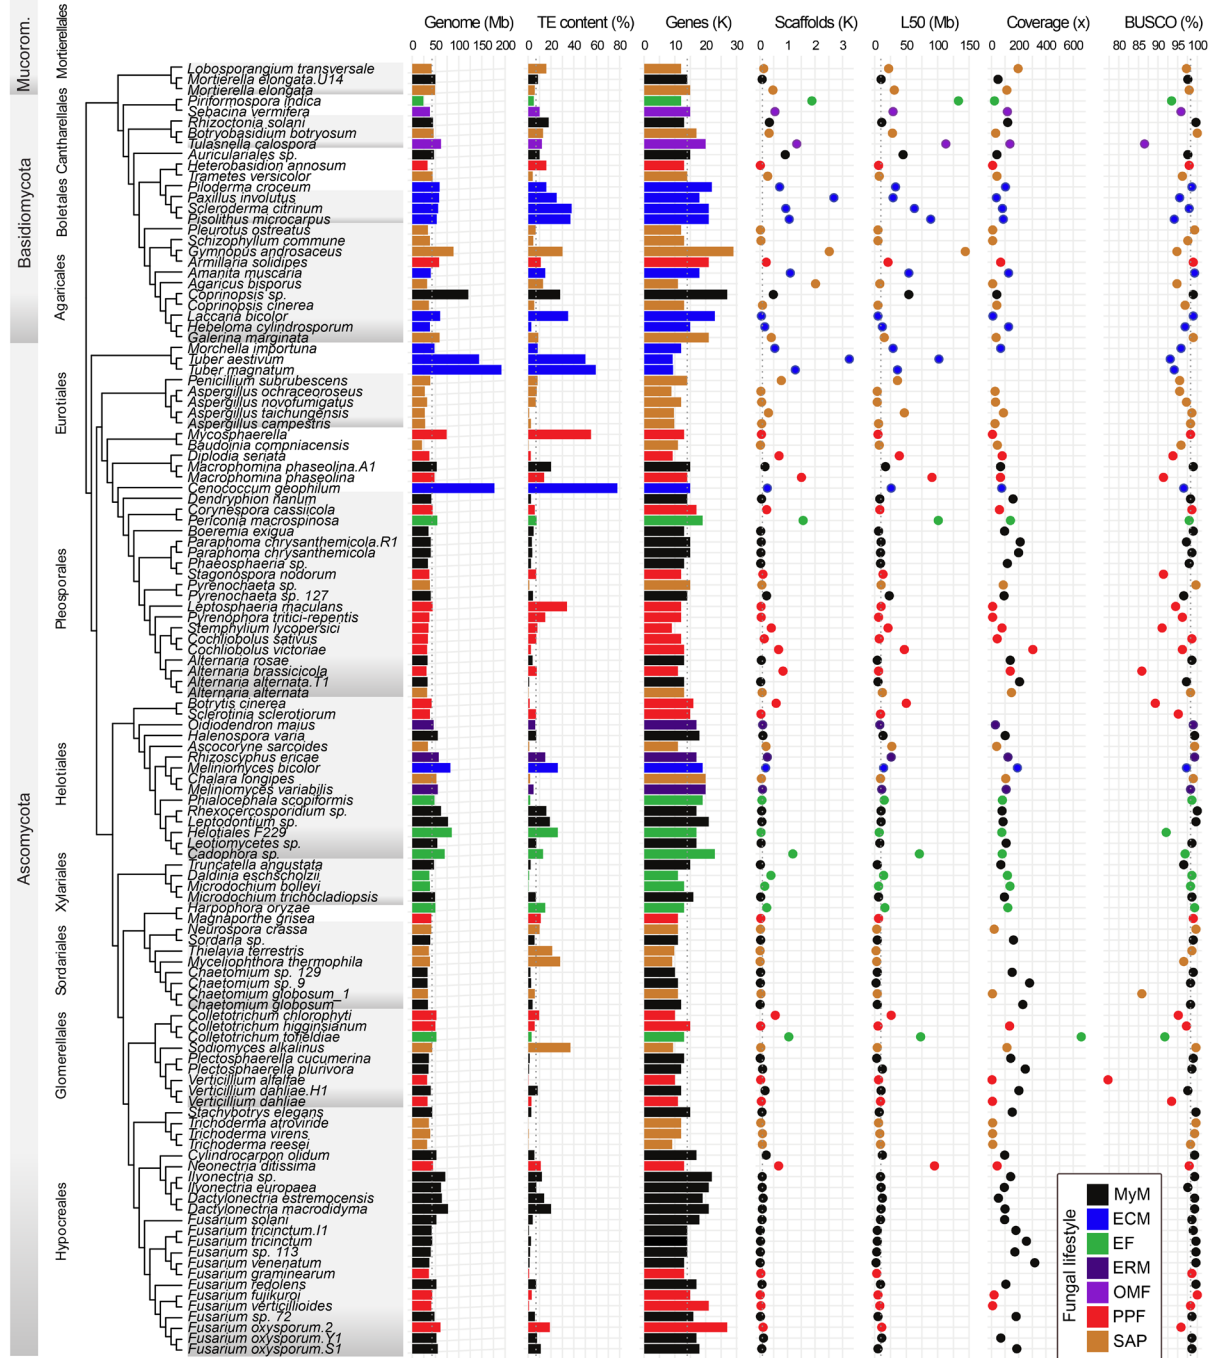

1001

1002

1003 **Extended Data Fig. 2: Genome sizes and properties of the 41 root mycobiota members, along**

1004 **with 79 previously published genomes used for comparative genomics.** The species are in the

1005 evolutionary order. Fungal lifestyle is depicted in colour. Median values are depicted in dotted line.

1006 Genome: Genome size. TE content: The coverage of transposable elements in the genomes. Genes:

1007 The number of genes. Secreted: The number of theoretically secreted proteins (**Methods**). Scaffolds:

1008 The number of scaffolds. L50: N50 length. Coverage: Sequencing depth in fold. BUSCO: Genome

1009 completeness. SAP: Saprotrophs, EF: Endophytic Fungi, PPF: Plant Pathogenic Fungi, ECM:



1010 Ectomycorrhiza, ERM: Ericoid Mycorrhiza, OMF: Orchid Mycorrhizal Fungi, MyM *A. thaliana*  
1011 mycobiota members.  
1012  
1013  
1014  
1015  
1016  
1017  
1018  
1019  
1020  
1021  
1022  
1023  
1024  
1025  
1026  
1027  
1028  
1029  
1030  
1031  
1032  
1033  
1034  
1035  
1036  
1037  
1038  
1039  
1040

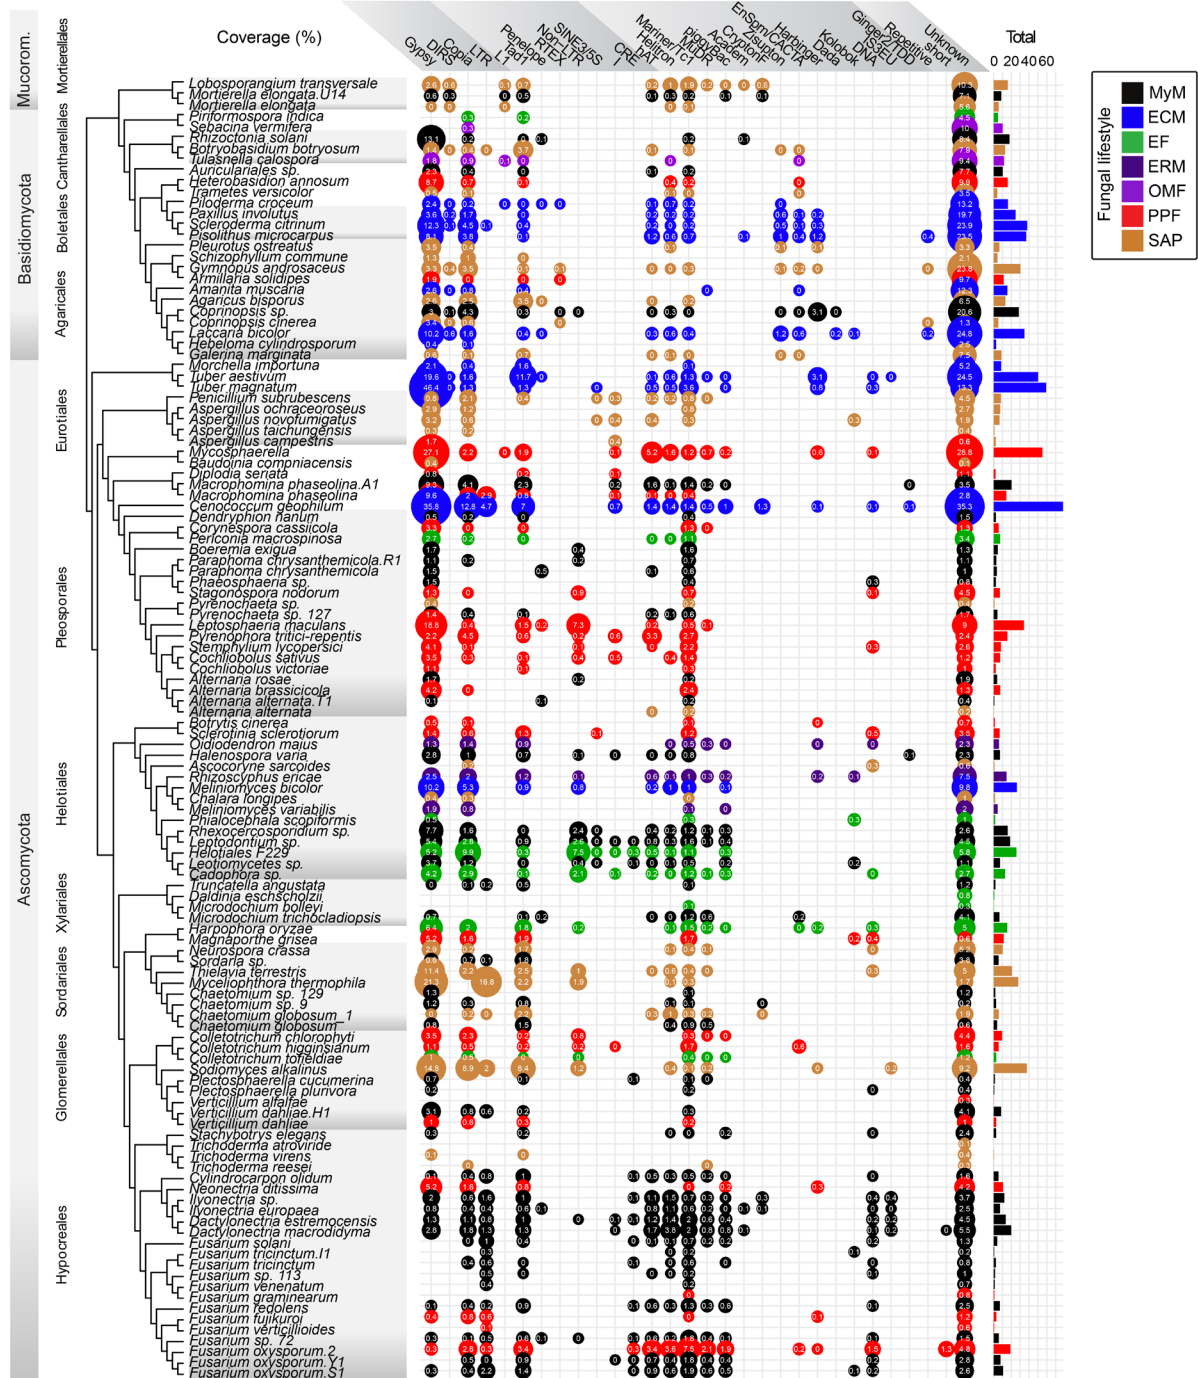

1041

1042

1043 **Extended Data Fig. 3: Genomic compositions in transposable elements across the fungal**

1044 **dataset.** Coverage of transposable elements in 120 fungi analysed. LTR: Long terminal repeat

1045 retrotransposons. Non-LTR: Non- long terminal repeat retrotransposons. DNA: DNA transposons.

1046 Repetitive/short: Simple repeats. Unknown: Unclassified repeated sequences. The bubble size is

1047 proportional to the coverage of each of the transposable elements (shown inside the bubbles). The

1048 right bars show the total coverage per genome. SAP: Saprotrophs, EF: Endophytic Fungi, PPF: Plant

1049 Pathogenic Fungi, ECM: Ectomycorrhiza, ERM: Ericoid Mycorrhiza, OMF: Orchid Mycorrhizal Fungi,  
1050 MyM: *A. thaliana* mycobiota members.  
1051  
1052  
1053  
1054  
1055  
1056  
1057  
1058  
1059  
1060  
1061  
1062  
1063  
1064  
1065  
1066  
1067  
1068  
1069  
1070  
1071  
1072  
1073  
1074  
1075  
1076  
1077  
1078  
1079

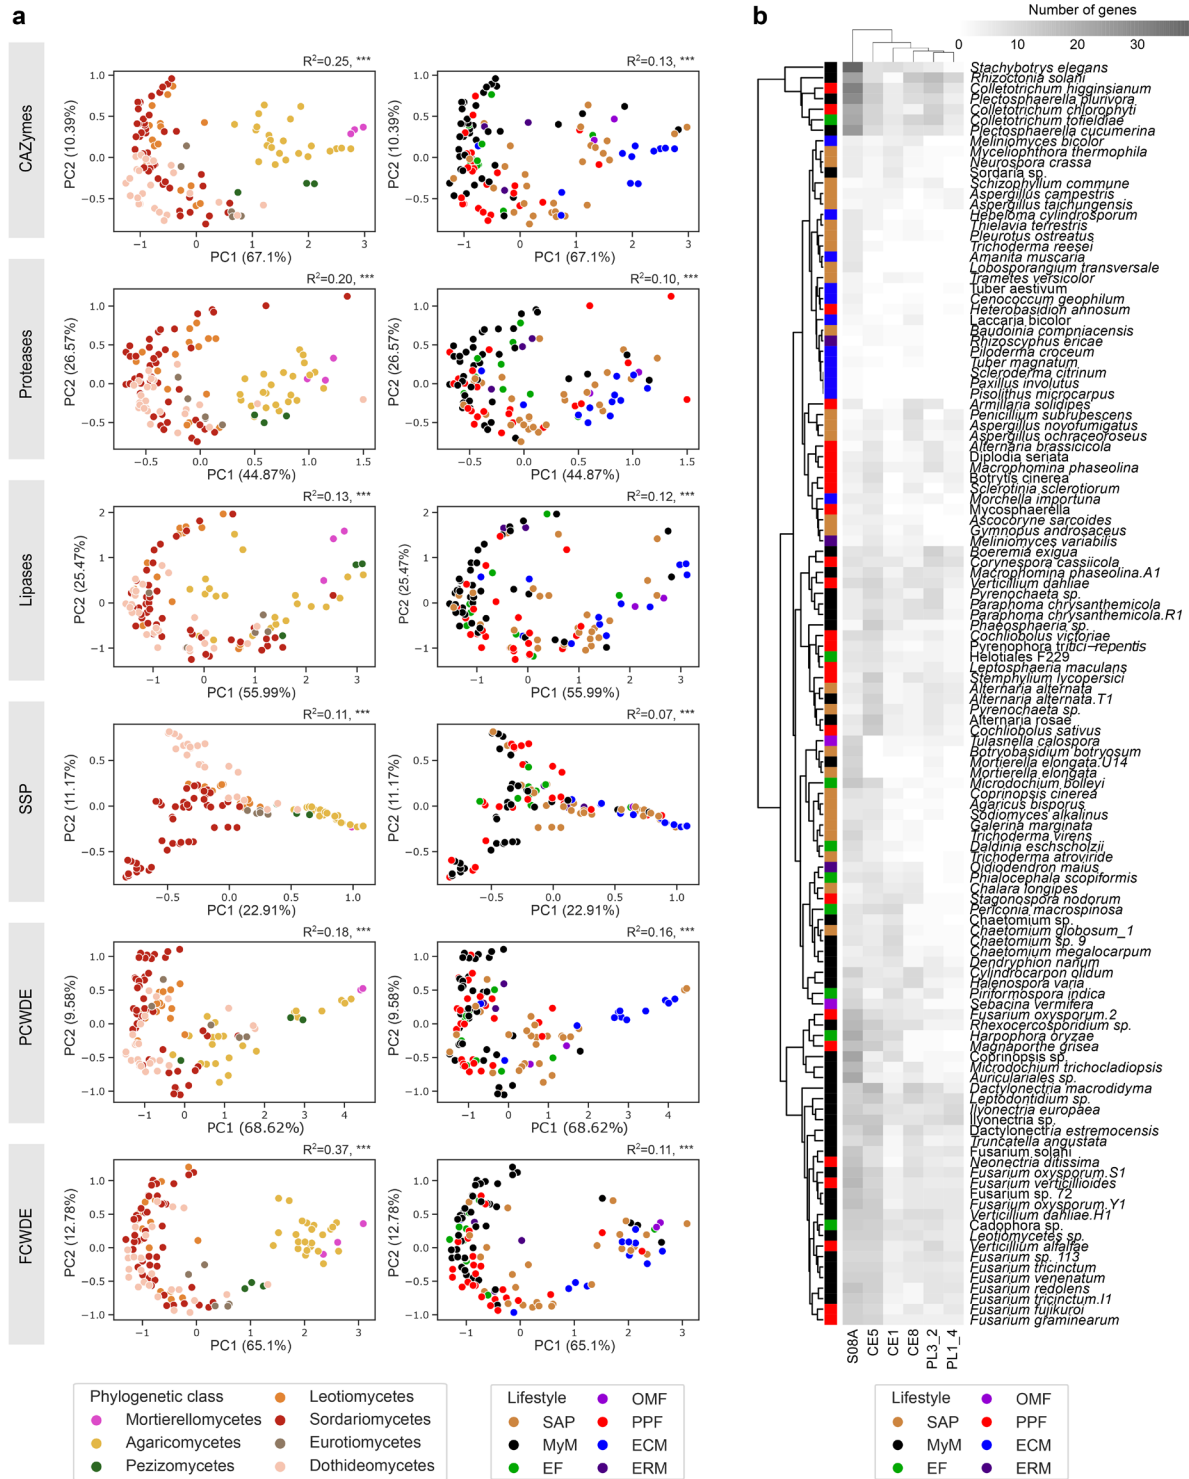

1080

1081

1082 **Extended Data Fig. 4: Differential composition in CAZyme, protease, lipase and SSP**

1083 **repertoires according to fungal phylogeny and lifestyle. a, Principal component analysis of**

1084 **Jaccard distances calculated on the genomic compositions in subfamilies of CAZymes, proteases,**

1085 **lipases, small secreted proteins (SSP), plant cell wall degrading enzymes (PCWDE) and fungal cell-**

1086 **wall degrading enzymes (FCWDE). Left and right columns of graphs are identical except for the colour**

1087 coding showing, respectively, fungal phylogeny and fungal lifestyle. Both of these factors significantly  
1088 explain genomic compositions (PERMANOVA, JaccardMatrix~Phylogeny+Lifestyle,  $P < 0.05$ ). **b**,  
1089 Distributions of high loading genes for secreted proteins. S08A: a subfamily S8A secreted serine  
1090 proteases from proteinase K subfamily. CE: Carbohydrate esterases. PL: Polysaccharide lyases.  
1091 Colours indicate the ecological style. SAP: Saprotrophs, EF: Endophytic Fungi, PPF: Plant Pathogenic  
1092 Fungi, ECM: Ectomycorrhiza, ERM: Ericoid Mycorrhiza, OMF: Orchid Mycorrhizal Fungi, MyM: *A.*  
1093 *thaliana* mycobiota members. Double clustering heatmap grouping the fungi based on the gene count.  
1094 Principal components were calculated with theoretically secreted and the total present in the genomes  
1095 for predicted secretome. High loading genes were determined based on the first three principal  
1096 components.

1097

1098

1099

1100

1101

1102

1103

1104

1105

1106

1107

1108

1109

1110

1111

1112

1113

1114

1115

1116

1117



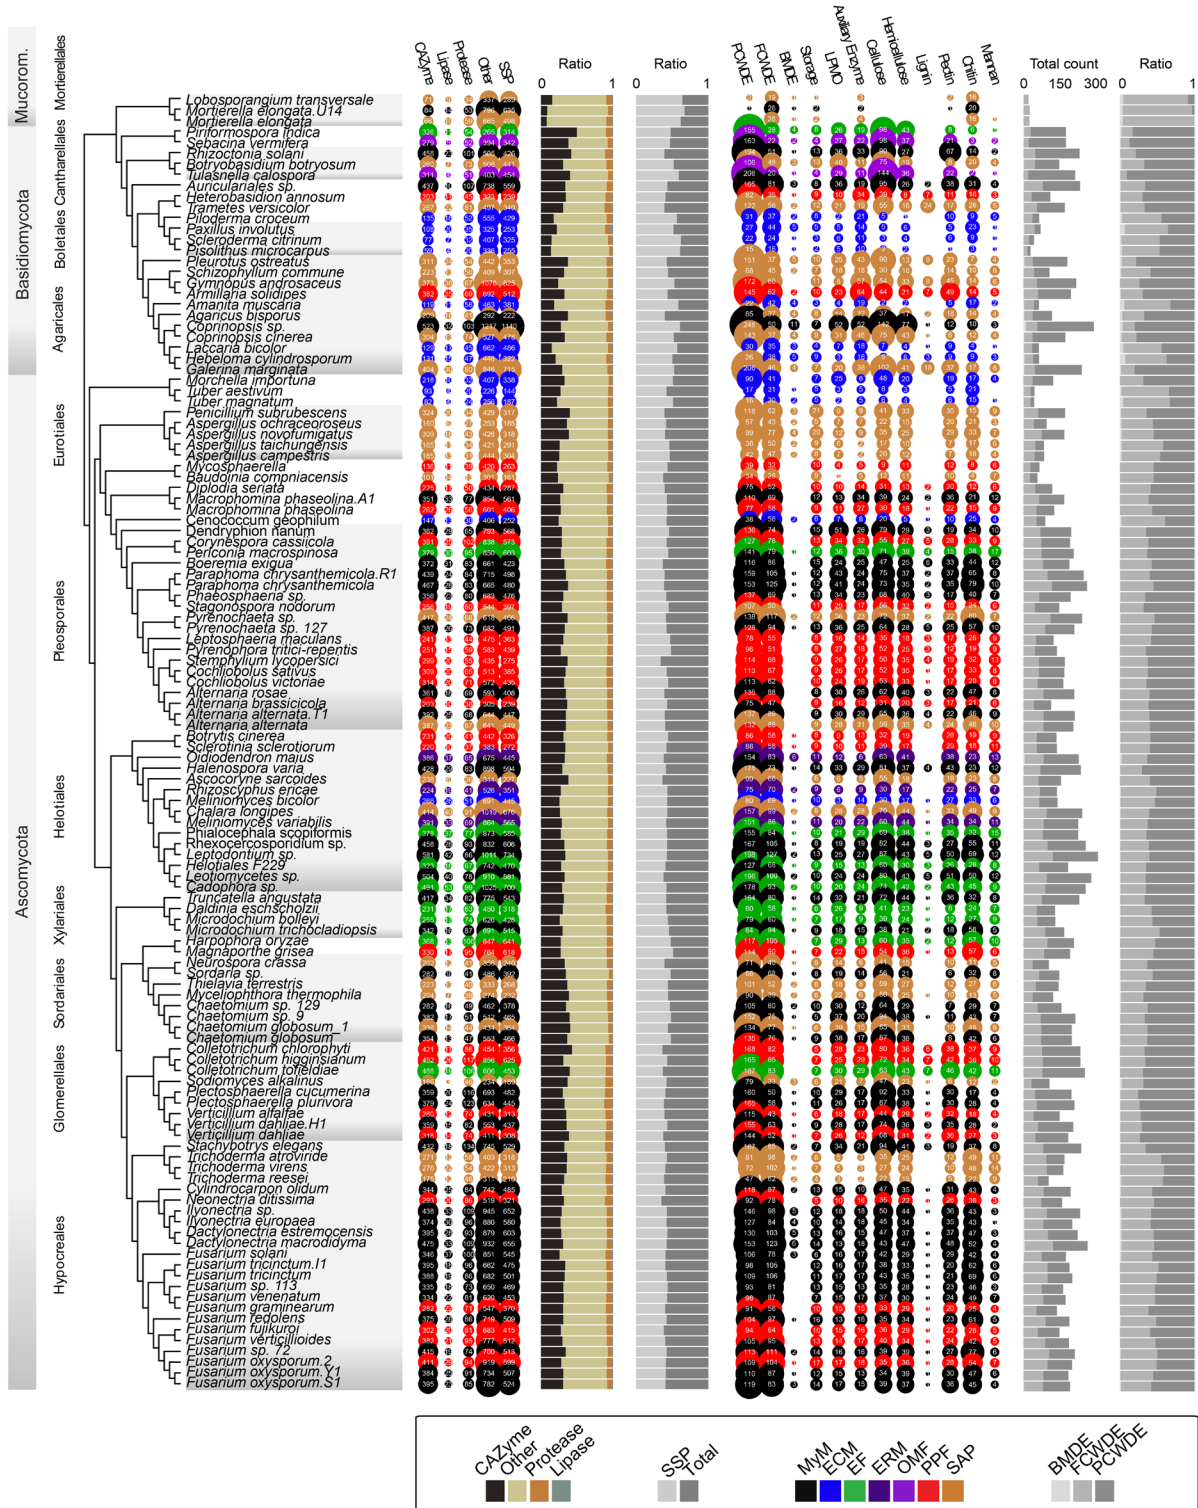



1125 represent the ratio of CAZymes, lipases and proteases, to all secreted proteins (left); and the ratio of  
1126 SSPs among the entire secretome (right). The second bubble plot (on the right) shows CAZyme  
1127 grouped according to their functions including plant cell-wall degrading enzymes (PCWDE) and fungal  
1128 cell wall degrading enzymes (FCWDE), peptidoglycans (i.e., bacterial membrane) degrading enzymes  
1129 (BMDE), trehalose, starch, glycogen degrading enzymes (Storage), lytic polysaccharide  
1130 monooxygenase (LPMO), substrate-specific enzymes for cellulose, hemicellulose, lignin, and pectin  
1131 (plant cell walls); chitin, glucan, mannan (fungal cell walls). The second bar plots (far right) show the  
1132 total count of genes including PCWDE, MCWDE, and BMDE (left); and the proportion of PCWDE,  
1133 MCWDE, and BMDE (right). SAP: Saprotrophs, EF: Endophytic Fungi, PPF: Plant Pathogenic Fungi,  
1134 ECM: Ectomycorrhiza, ERM: Ericoid Mycorrhiza, OMF: Orchid Mycorrhizal Fungi, MyM: *A. thaliana*  
1135 mycobiota members.

1136

1137

1138

1139

1140

1141

1142

1143

1144

1145

1146

1147

1148

1149

1150

1151

1152

1153

1154

1155

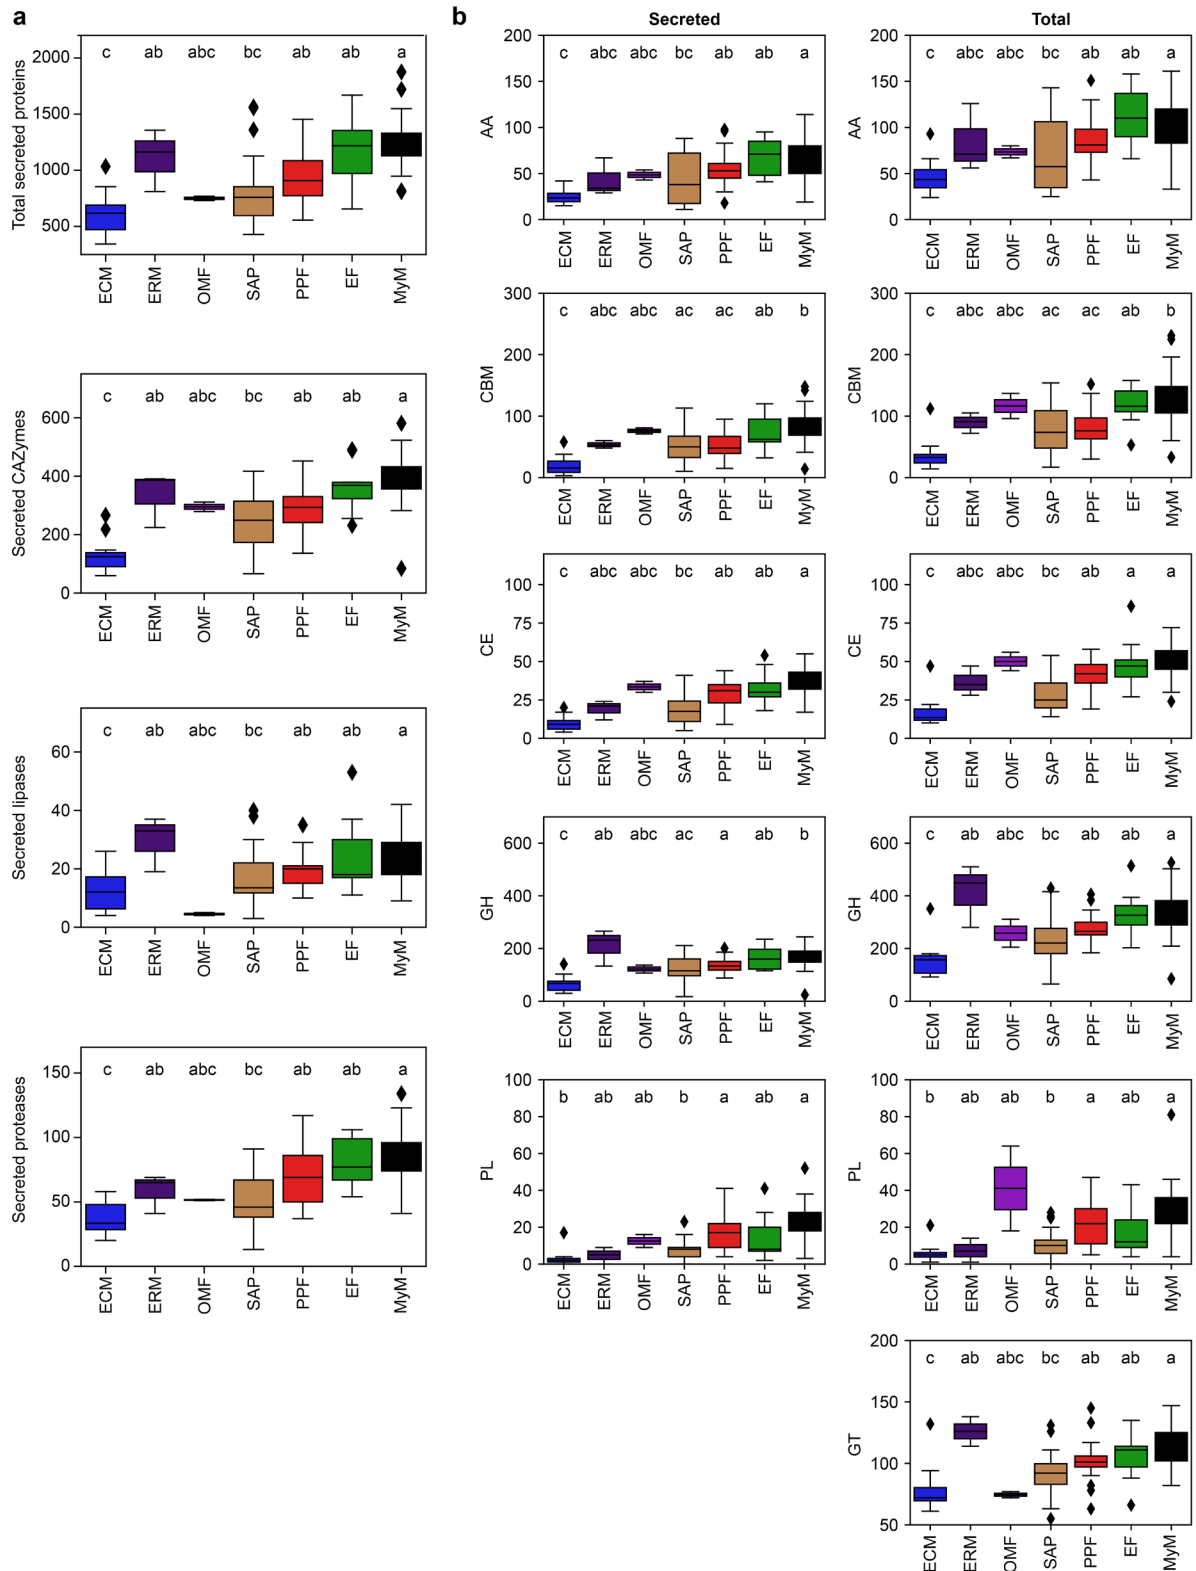

1156

1157

1158 **Extended Data Fig. 6: Genomic counts of secreted CAZymes (and subfamilies), proteases and**

1159 **lipases across fungal lifestyles. a, Genomic counts of total secreted proteins, and secreted**

1160 **CAZymes, lipases and proteases. ANOVA-statistical testing (Counts~PhylogenyPCs+Lifestyle,**

1161 **Methods) identified both phylogeny and lifestyles as having an effect on genomic contents; letters**

1162 result from post-hoc TukeyHSD testing. **b**, Gene counts of CAZyme families (AA: Auxiliary Activities,  
1163 CBM: Carbohydrate-Binding Modules, CE: Carbohydrate Esterases, GH: Glycoside Hydrolases, PL:  
1164 Polysaccharide Lyases), predicted as secreted (extracellular, left) and total (intra and extracellular,  
1165 right). Statistical testing with Kruskal-Wallis (Counts~Lifestyle) identified lifestyle as having an effect  
1166 on genome contents. Letters result from post-hoc testing with a Dunn test. SAP: Saprotrophs, EF:  
1167 Endophytic Fungi, PPF: Plant Pathogenic Fungi, ECM: Ectomycorrhiza, ERM: Ericoid Mycorrhiza,  
1168 OMF: Orchid Mycorrhizal Fungi, MyM: *A. thaliana* mycobiota members.

1169

1170

1171

1172

1173

1174

1175

1176

1177

1178

1179

1180

1181

1182

1183

1184

1185

1186

1187

1188

1189

1190

1191

1192

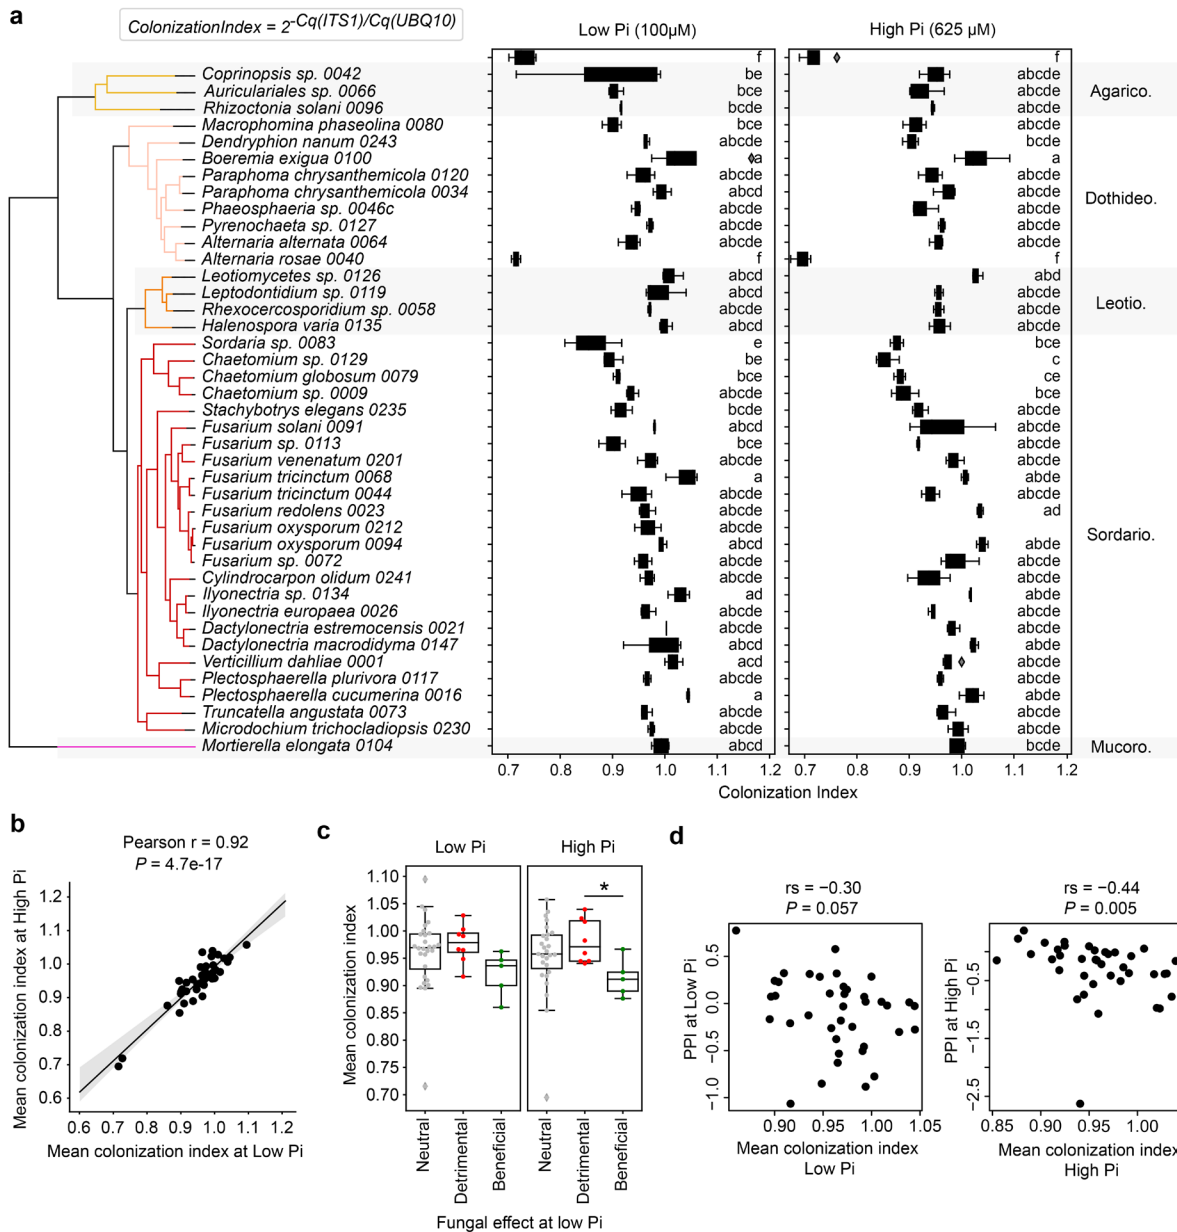

1193

1194

1195 **Extended Data Fig. 7: Fungal colonization of roots after 28 days of culture in mono-association**

1196 **a)** Fungal colonization of plant roots mono-inoculated with different mycobiota members, estimated by  
 1197 quantitative PCR (**Methods**). Statistical difference across treatments was identified by ANOVA  
 1198 ( $ColonizationIndex \sim Treatment$ ), and post-hoc testing was performed with TukeyHSD. **b,** Pearson  
 1199 correlation between colonization indexes at low and high Pi concentrations ( $P < 0.05$ ). **c,** Differences  
 1200 in colonization indices between neutral, beneficial, and detrimental fungi at low Pi. Significant  
 1201 differences across fungal groups were identified by ANOVA and TukeyHSD. **d,** Correlation between  
 1202 plant performance index and mean colonization index at low Pi (left) and high Pi (right) ( $n = 41$ ,  
 1203 Spearman's rank correlation).

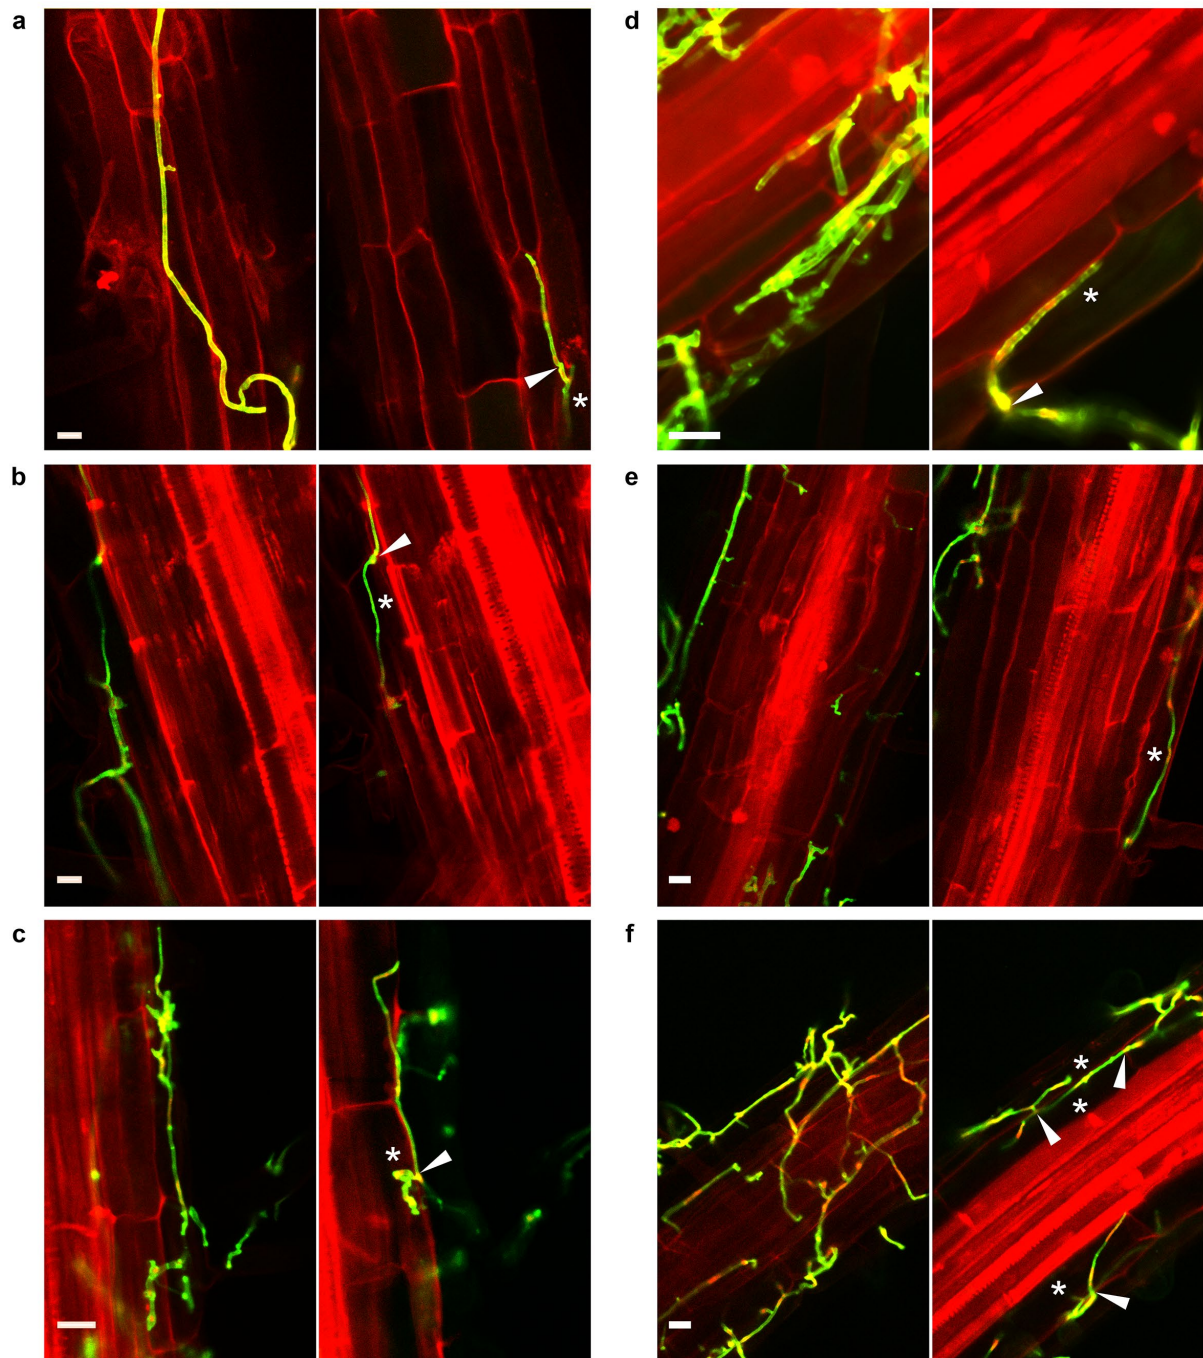

1204

1205

1206 **Extended Data Fig. 8: Confocal imaging of root surface and epidermis colonization by**

1207 **mycobiota members.** Roots grown for 4 weeks in mono-association with six diverse fungi, double-

1208 stained with Propidium Iodide and Wheat Germ Agglutinin coupled to fluorophore CF488 (WGA-488;

1209 Biotium), imaged by confocal microscopy. Left and right picture belong to a single z-stack, respectively

1210 focusing on the root surface and the root endosphere where colonization of epidermal cells can be

1211 observed. Arrows indicate penetration sites and asterisks infected root cells. **a**, Cs = *Chaetomium sp.*

1212 0009. **b**, *Mp* = *Macrophomina phaseolina* 0080. **c**, *Pc* = *Paraphoma chrysanthemicola* 0120. **d**, *Ps* =  
1213 *Phaeosphaeria* sp. 0046c. **e**, *Ta* = *Truncatella angustata* 0073 **f**, *Hv* = *Halenospora varia* 0135.

1214

1215

1216

1217

1218

1219

1220

1221

1222

1223

1224

1225

1226

1227

1228

1229

1230

1231

1232

1233

1234

1235

1236

1237

1238

1239

1240

1241

1242



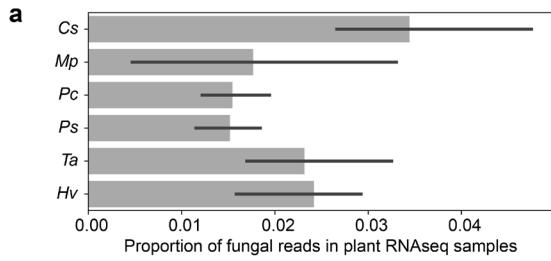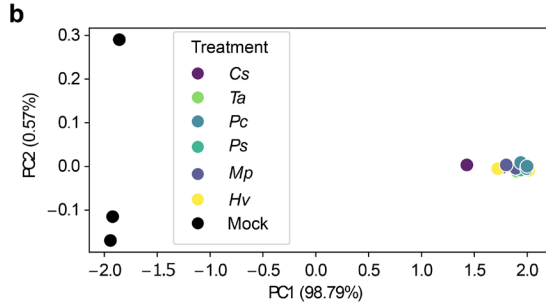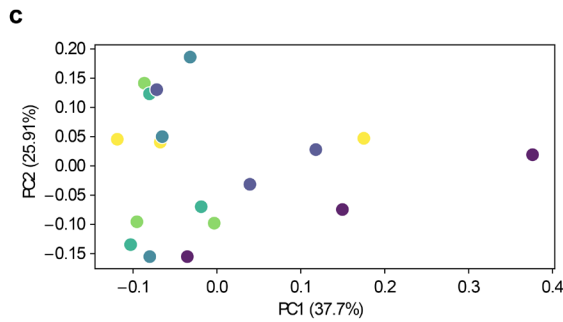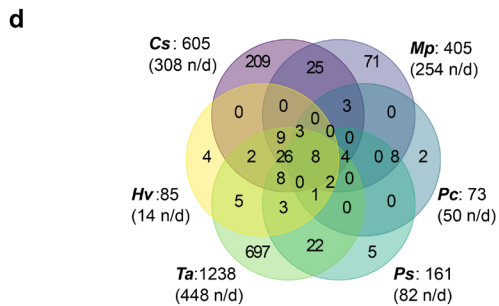

AT2G43610: Chitinase family, AT1G22890: STMP2 (Secreted peptide),  
 AT1G26410: FAD-binding Berberine family, AT5G20250: Raffinose synthase 6,  
 AT4G14630: Germin-like protein 9, AT1G26240: Extensin 19, AT1G78290:  
 SNF1-related protein kinase 2.8, AT5G63160: BTB and TAZ domains

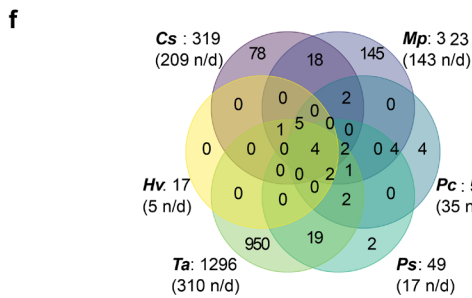

AT1G22150: sulfate transporter Sultr1;3, AT4G31330: transmembrane protein DUF599, AT5G14565: MIR398C, microRNA targeting CSD and Cytc oxidase family, AT5G14570: Nitrate transporter ATNRT2.7

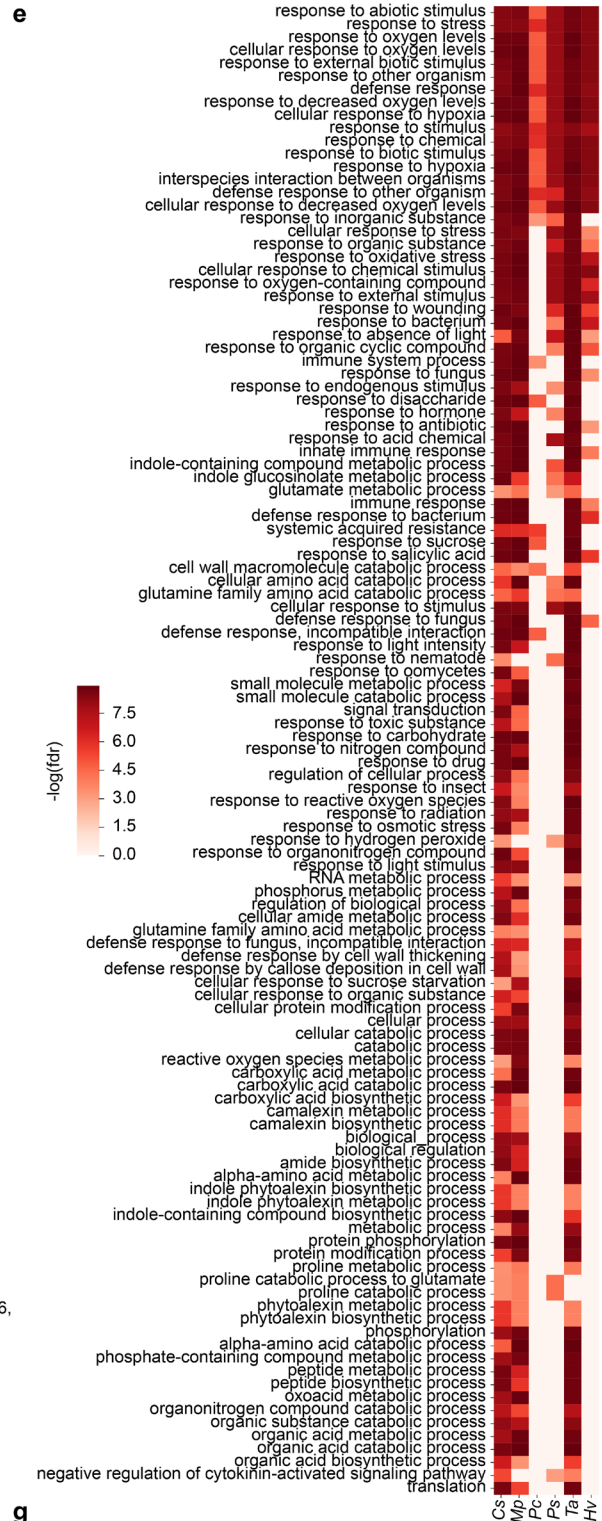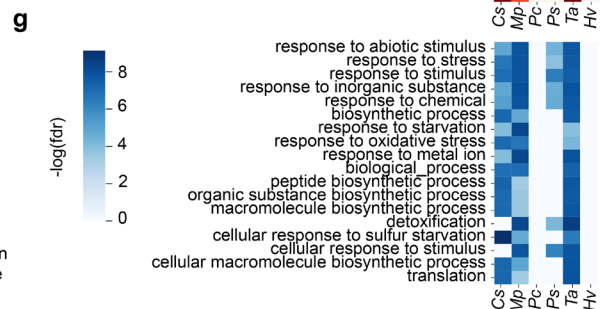

1243

1244

1245 **Extended Data Fig. 9: *Arabidopsis thaliana* transcriptional reprogramming upon colonization**  
1246 **by different root mycobiota members.** **a**, Proportion of reads in RNA-Seq samples mapped on  
1247 fungal genomes. **b**, Principal Component Analysis of Bray-Curtis distances calculated over *A. thaliana*  
1248 gene read counts. **c**, Principal Component Analysis of Bray-Curtis distances calculated over *A.*  
1249 *thaliana* gene read counts, excluding mock-treated samples to reveal sample differences due to the  
1250 different fungi. *Cs* = *Chaetomium sp. 0009*, *Mp* = *Macrophomina phaseolina 0080*, *Pc* = *Paraphoma*  
1251 *chrysantemicola 0034*, *Ps* = *Phaeosphaeria sp. 0046c*, *Ta* = *Truncatella angustata 0073*, *Hv* =  
1252 *Halenospora varia 0135*. **d**, Venn diagram showing *A. thaliana* commonly over-expressed genes in  
1253 response to fungal inoculations. On the right is the list of genes over-expressed in response to all six  
1254 fungi. **e**, Independent GO enrichment analyses performed on the *Arabidopsis* genes over-expressed in  
1255 response to each fungus (GOATOOLS, FDR < 0.05). **f**, Venn diagram showing *A. thaliana* commonly  
1256 under-expressed genes in response to fungal inoculations. On the right is the list of genes under-  
1257 expressed in response to all six fungi. **g**, Independent GO enrichment analyses performed on the  
1258 *Arabidopsis* genes under-expressed in response to each fungus (GOATOOLS, FDR < 0.05).  
1259  
1260  
1261  
1262  
1263  
1264  
1265  
1266  
1267  
1268  
1269  
1270  
1271  
1272  
1273  
1274  
1275

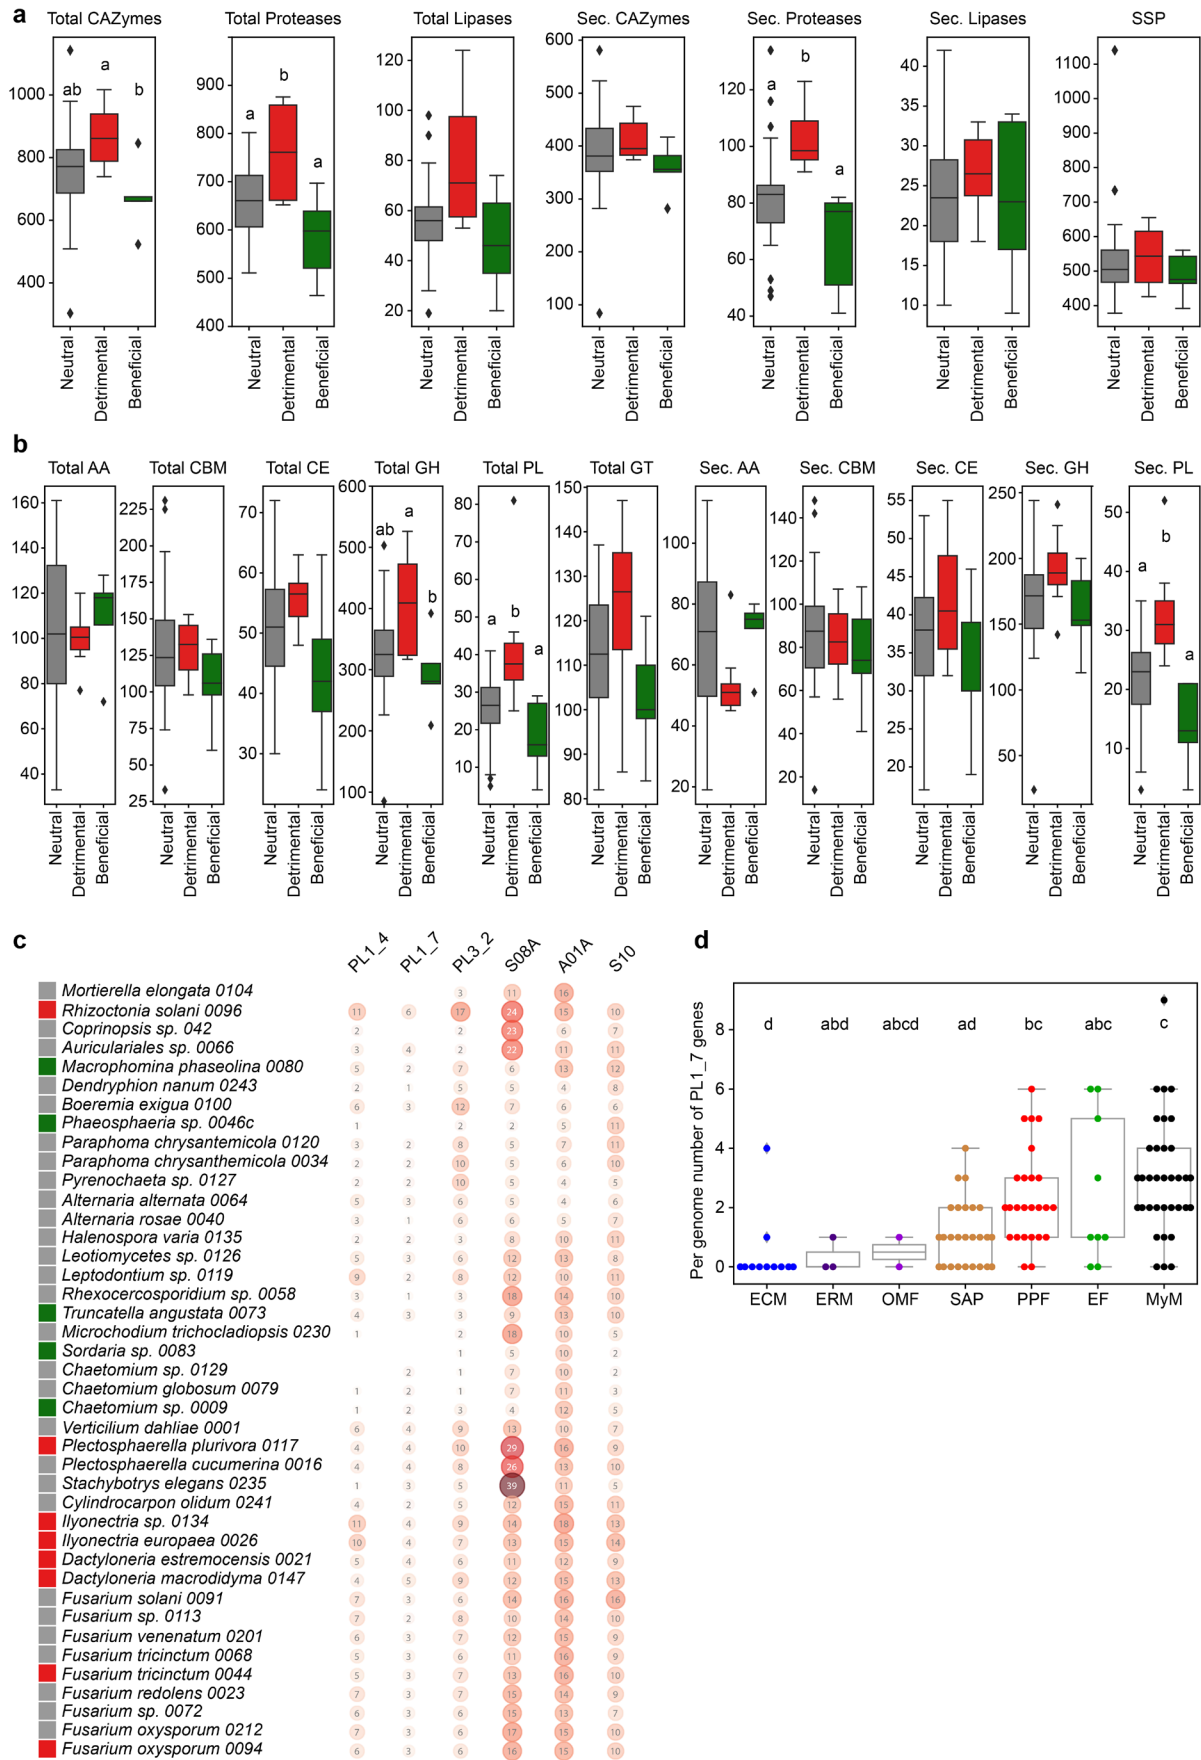

1276

1277

1278 **Extended Data Fig. 10: Genomic signatures in polysaccharide lyase repertoires explain**  
1279 **lifestyle differentiation among root mycobiota members. a,** Distribution of genes encoding  
1280 secreted or total (secreted with intracellular) proteins in 41 endophytic fungi. a) CAZymes, lipases,  
1281 protease, SSPs. **b,** CAZyme family. Different letters indicate significant difference (FDR adjusted  $P <$   
1282 0.05; Kruskal Wallis test). Beneficial (n = 5), neutral (26), pathogenic (10). **c,** Key secreted protein  
1283 coding genes discriminating fungal lifestyles of 41 endophytic fungi. Three fungal lifestyles are  
1284 depicted in colour. The selected genes coding for secreted polysaccharide lyases (PLs) and proteases  
1285 discriminate between pathogenic, neutral, and beneficial endophytic fungi. Fungal taxa are displayed  
1286 according to the phylogenetic order. Bubbles with numbers contain the number of genes. **d,**  
1287 Comparative genomics of PL1\_7, showing the number of PL1\_7 genes in the genomes associated to  
1288 different lifestyles. Statistics were performed using an ANOVA test and a TukeyHSD post-hoc test.

1289

1290

1291

1292

1293

1294

1295

1296

1297

1298

1299

1300

1301

1302

1303

1304

1305

1306

1307

1308

1309 **Supplementary Tables**

1310

1311 **Supplementary Table 1:** Description of the 41 newly-sequenced strains of *A. thaliana* root mycobiota  
1312 members

1313

1314 **Supplementary Table 2:** Description of the comparative genomics dataset, comprising our 41 newly-  
1315 sequenced strains and 79 published fungal genomes

1316

1317 **Supplementary Table 3:** Orthogroups that segregate best endophytes and mycobiota members from  
1318 other fungi. **a**, Description of the 84 orthogroups. **b**, GO enrichment analysis performed on the 84  
1319 orthogroups. **c**, Coexpression of the 84 gene families in fungi, according to STRING<sup>29</sup>.

1320

1321 **Supplementary Table 4:** Differential fungal gene expression in planta vs. on medium.

1322

1323 **Supplementary Table 5:** Differential host gene expression inoculated with fungi *versus* mock-treated.

1324

1325 **Supplementary Table 6:** Description of the 11 orthogroups segregating detrimental mycobiota  
1326 members from others.
